# Supplementary material
Source: Research Square preprint supplement (doi:10.21203/rs.3.rs-9449108/v1)
Supplement: Supplementary file 1 [file 29c42599eb6fff2dd66e0ecb.xlsx]

## Sheet: Complete_Analysis
Variable	Variable_Type	Metric	Sedentary_Median_IQR	Athletes_Median_IQR	Slackliners_Median_IQR	KW_Statistic	KW_p_value	PostHoc_p_Sed_vs_Ath	PostHoc_p_Sed_vs_Slack	PostHoc_p_Ath_vs_Slack
Cop X	COP	IQR	8.956 [8.222-9.111]	7.139 [6.603-9.878]	9.983 [6.763-11.506]	1.08473	0.581372
Cop X	COP	Mean	-0.766 [-7.358-1.349]	3.285 [-3.880-4.766]	5.521 [2.855-7.048]	7.26264	0.0264812	0.922302	0.0201188	0.589536
Cop X	COP	Median	-0.458 [-2.239-2.825]	1.711 [-4.378-4.867]	3.433 [2.778-6.092]	4.77666	0.091783
Cop X	COP	Q05	-13.357 [-24.282--9.631]	-5.460 [-11.983--4.230]	-4.421 [-11.527--3.064]	6.31494	0.0425332	0.136366	0.095202	1
Cop X	COP	Q95	8.594 [5.428-14.980]	11.892 [10.417-14.685]	15.420 [12.436-25.180]	6.15062	0.0461754	1	0.0549729	0.331836
Cop X	COP	Range	24.418 [19.083-38.213]	16.920 [16.254-25.542]	20.887 [17.351-31.410]	1.59271	0.450969
Cop X	COP	Std	7.567 [5.719-10.535]	5.209 [5.111-7.898]	6.636 [5.415-10.130]	1.49242	0.47416
Cop Y	COP	IQR	19.033 [15.532-25.367]	14.533 [10.600-16.864]	18.494 [14.101-34.569]	1.90595	0.385592
Cop Y	COP	Mean	4.042 [-3.788-22.460]	-17.666 [-30.439--10.357]	-4.220 [-13.784-4.508]	6.10036	0.0473504	0.0914585	0.339307	0.589536
Cop Y	COP	Median	3.178 [-1.775-21.644]	-16.211 [-18.989--8.833]	-5.911 [-12.558-2.625]	6.24882	0.0439628	0.112009	0.186093	0.763352
Cop Y	COP	Q05	-15.914 [-35.130--8.455]	-38.494 [-51.213--25.663]	-23.294 [-38.429--15.866]	2.50018	0.28648
Cop Y	COP	Q95	30.157 [13.707-45.502]	2.810 [-0.376-9.077]	10.216 [7.178-24.081]	5.02247	0.0811679
Cop Y	COP	Range	42.827 [36.949-51.383]	38.280 [31.306-43.440]	35.620 [31.686-58.767]	0.0713457	0.964956
Cop Y	COP	Std	12.991 [11.631-15.515]	11.499 [9.578-13.186]	11.493 [10.032-19.772]	0.286556	0.866513
Cell 1	Cell_Normalized	IQR	0.024 [0.020-0.032]	0.019 [0.016-0.030]	0.019 [0.017-0.032]	1.42892	0.489456
Cell 1	Cell_Normalized	Mean	0.253 [0.243-0.275]	0.237 [0.235-0.243]	0.245 [0.232-0.249]	4.67307	0.0966622
Cell 1	Cell_Normalized	Median	0.254 [0.242-0.271]	0.239 [0.235-0.244]	0.243 [0.231-0.247]	5.27737	0.0714553
Cell 1	Cell_Normalized	Q05	0.224 [0.215-0.250]	0.216 [0.194-0.225]	0.213 [0.205-0.229]	3.46704	0.176661
Cell 1	Cell_Normalized	Q95	0.289 [0.264-0.309]	0.258 [0.254-0.280]	0.266 [0.257-0.273]	4.67307	0.0966622
Cell 1	Cell_Normalized	Range	0.059 [0.043-0.077]	0.051 [0.035-0.060]	0.051 [0.040-0.074]	0.739381	0.690948
Cell 1	Cell_Normalized	Std	0.019 [0.014-0.022]	0.016 [0.011-0.017]	0.015 [0.013-0.024]	0.811026	0.666635
Cell 2	Cell_Normalized	IQR	0.017 [0.015-0.022]	0.015 [0.014-0.020]	0.028 [0.018-0.036]	2.60914	0.27129
Cell 2	Cell_Normalized	Mean	0.261 [0.239-0.277]	0.244 [0.220-0.257]	0.251 [0.247-0.262]	2.51507	0.284354
Cell 2	Cell_Normalized	Median	0.262 [0.240-0.279]	0.243 [0.230-0.259]	0.250 [0.246-0.258]	2.36358	0.306729
Cell 2	Cell_Normalized	Q05	0.221 [0.206-0.249]	0.232 [0.198-0.238]	0.231 [0.207-0.234]	0.375705	0.828737
Cell 2	Cell_Normalized	Q95	0.289 [0.265-0.308]	0.267 [0.257-0.277]	0.283 [0.270-0.292]	3.59191	0.165969
Cell 2	Cell_Normalized	Range	0.051 [0.036-0.056]	0.045 [0.034-0.054]	0.058 [0.046-0.076]	1.8952	0.387671
Cell 2	Cell_Normalized	Std	0.015 [0.011-0.016]	0.014 [0.010-0.016]	0.021 [0.014-0.025]	2.11866	0.346688
Cell 3	Cell_Normalized	IQR	0.018 [0.015-0.021]	0.016 [0.014-0.020]	0.024 [0.020-0.051]	4.74153	0.0934092
Cell 3	Cell_Normalized	Mean	0.253 [0.243-0.261]	0.268 [0.267-0.277]	0.258 [0.239-0.266]	3.69958	0.15727
Cell 3	Cell_Normalized	Median	0.249 [0.242-0.256]	0.268 [0.266-0.276]	0.255 [0.236-0.260]	4.43038	0.109133
Cell 3	Cell_Normalized	Q05	0.227 [0.223-0.239]	0.242 [0.236-0.252]	0.227 [0.212-0.237]	3.62006	0.163649
Cell 3	Cell_Normalized	Q95	0.270 [0.261-0.300]	0.291 [0.284-0.307]	0.293 [0.287-0.324]	0.790486	0.673517
Cell 3	Cell_Normalized	Range	0.039 [0.032-0.053]	0.049 [0.045-0.057]	0.064 [0.050-0.090]	4.04667	0.132214
Cell 3	Cell_Normalized	Std	0.012 [0.010-0.016]	0.015 [0.013-0.017]	0.021 [0.016-0.034]	4.86466	0.087832
Cell 4	Cell_Normalized	IQR	0.017 [0.015-0.026]	0.015 [0.013-0.016]	0.024 [0.017-0.040]	4.91764	0.0855358
Cell 4	Cell_Normalized	Mean	0.237 [0.233-0.256]	0.267 [0.258-0.269]	0.264 [0.256-0.268]	6.1429	0.0463539	0.074234	0.158423	1
Cell 4	Cell_Normalized	Median	0.240 [0.233-0.256]	0.260 [0.248-0.270]	0.258 [0.246-0.266]	3.96352	0.137827
Cell 4	Cell_Normalized	Q05	0.217 [0.212-0.238]	0.235 [0.228-0.248]	0.238 [0.219-0.246]	3.25642	0.19628
Cell 4	Cell_Normalized	Q95	0.263 [0.254-0.279]	0.286 [0.281-0.302]	0.302 [0.287-0.326]	8.93113	0.0114982	0.048033	0.0304873	1
Cell 4	Cell_Normalized	Range	0.040 [0.033-0.048]	0.040 [0.038-0.054]	0.055 [0.051-0.091]	4.09872	0.128818
Cell 4	Cell_Normalized	Std	0.013 [0.011-0.016]	0.012 [0.012-0.018]	0.019 [0.016-0.032]	3.93418	0.139863
APT	Kinematic	IQR	18.557 [11.096-21.181]	21.455 [16.461-26.117]	17.754 [16.278-22.679]	1.70376	0.426612
APT	Kinematic	Mean	11.435 [9.424-13.074]	19.186 [15.416-20.872]	11.349 [10.159-15.836]	8.12957	0.0171667	0.030337	1	0.0679635
APT	Kinematic	Median	10.468 [9.565-13.439]	21.130 [13.337-24.227]	10.773 [7.998-14.893]	7.53993	0.0230529	0.038289	1	0.082734
APT	Kinematic	Q05	-1.151 [-3.607-0.229]	1.140 [-1.983-2.120]	-1.747 [-3.038--0.223]	2.44282	0.294815
APT	Kinematic	Q95	24.053 [21.496-29.785]	35.209 [32.731-38.533]	28.273 [24.835-31.109]	7.99271	0.0183825	0.0598934	1	0.0555404
APT	Kinematic	Range	26.631 [22.474-29.999]	32.463 [30.265-36.413]	29.892 [25.342-34.006]	3.14247	0.207788
APT	Kinematic	Std	9.506 [6.993-10.665]	11.515 [9.500-13.716]	10.401 [8.578-12.154]	2.92152	0.232059
ElbowLeftFlexExt	Kinematic	IQR	9.667 [7.625-12.833]	13.875 [10.167-19.167]	21.000 [13.333-25.792]	3.80829	0.14895
ElbowLeftFlexExt	Kinematic	Mean	30.528 [22.359-47.013]	33.499 [26.224-41.876]	30.260 [24.826-31.772]	0.191672	0.908613
ElbowLeftFlexExt	Kinematic	Median	30.250 [22.000-47.250]	32.667 [24.000-39.667]	30.167 [24.417-32.750]	0.134458	0.934981
ElbowLeftFlexExt	Kinematic	Q05	18.433 [14.417-28.262]	19.000 [13.667-29.000]	12.150 [11.083-16.008]	3.26793	0.195154
ElbowLeftFlexExt	Kinematic	Q95	46.250 [33.637-86.950]	45.333 [37.667-53.608]	53.950 [45.042-55.650]	0.45766	0.795464
ElbowLeftFlexExt	Kinematic	Range	21.458 [17.208-39.317]	24.967 [20.250-31.000]	42.600 [29.367-47.183]	2.33203	0.311606
ElbowLeftFlexExt	Kinematic	Std	6.781 [5.900-11.927]	8.028 [6.603-10.077]	13.209 [9.826-15.702]	2.08581	0.352429
ElbowRightFlexExt	Kinematic	IQR	10.667 [8.083-15.750]	17.500 [12.167-17.833]	24.500 [16.667-34.542]	4.32362	0.115116
ElbowRightFlexExt	Kinematic	Mean	28.844 [23.140-44.165]	27.730 [27.535-39.444]	38.300 [28.953-41.675]	0.712493	0.7003
ElbowRightFlexExt	Kinematic	Median	24.833 [21.417-37.500]	28.333 [27.333-38.000]	32.000 [29.333-44.250]	1.83441	0.399634
ElbowRightFlexExt	Kinematic	Q05	16.333 [13.417-24.400]	16.000 [14.733-21.333]	13.683 [10.642-18.167]	1.50575	0.47101
ElbowRightFlexExt	Kinematic	Q95	59.550 [31.000-80.475]	41.333 [39.633-52.667]	59.000 [48.908-87.150]	0.938012	0.625624
ElbowRightFlexExt	Kinematic	Range	32.683 [16.975-44.800]	26.333 [24.600-33.833]	49.667 [29.867-64.575]	2.96409	0.227173
ElbowRightFlexExt	Kinematic	Std	10.178 [5.530-14.590]	9.270 [8.134-10.457]	15.656 [10.195-23.090]	2.90311	0.234206
HeadFlexExt	Kinematic	IQR	10.667 [9.167-12.917]	9.667 [8.750-12.333]	12.000 [7.083-18.438]	0.949358	0.622085
HeadFlexExt	Kinematic	Mean	-0.391 [-8.328-9.871]	6.879 [0.144-9.920]	9.115 [-0.924-11.633]	0.826979	0.661338
HeadFlexExt	Kinematic	Median	1.000 [-9.750-9.583]	9.000 [-1.333-10.333]	9.667 [-0.500-11.583]	1.03652	0.595556
HeadFlexExt	Kinematic	Q05	-10.450 [-16.975--4.317]	-5.233 [-11.333-2.000]	-4.000 [-13.900-2.967]	1.1681	0.557636
HeadFlexExt	Kinematic	Q95	12.050 [5.387-19.667]	15.250 [11.633-23.550]	21.000 [14.142-27.900]	1.80512	0.40553
HeadFlexExt	Kinematic	Range	23.400 [18.333-28.525]	19.967 [18.633-27.867]	25.533 [15.825-31.583]	0.150681	0.927428
HeadFlexExt	Kinematic	Std	7.350 [5.998-8.840]	6.350 [5.807-8.049]	8.645 [5.076-10.853]	0.498521	0.779377
HeadLatFlex	Kinematic	IQR	3.333 [3.083-4.792]	4.667 [4.667-7.000]	5.667 [4.333-6.333]	4.28213	0.11753
HeadLatFlex	Kinematic	Mean	-5.961 [-8.529--5.445]	-4.896 [-6.327--4.131]	-7.900 [-9.138--4.344]	1.1429	0.564706
HeadLatFlex	Kinematic	Median	-5.750 [-8.333--5.333]	-4.333 [-7.000--4.000]	-6.500 [-8.833--3.083]	0.571111	0.751597
HeadLatFlex	Kinematic	Q05	-12.067 [-15.667--9.000]	-12.100 [-15.017--10.000]	-15.667 [-17.667--11.508]	1.10932	0.574267
HeadLatFlex	Kinematic	Q95	-1.933 [-5.125--1.500]	0.333 [-1.000-0.383]	-0.667 [-2.967-1.000]	3.78879	0.150409
HeadLatFlex	Kinematic	Range	8.333 [6.917-9.729]	12.767 [11.000-15.017]	13.867 [9.458-15.200]	3.41461	0.181354
HeadLatFlex	Kinematic	Std	2.675 [2.294-3.300]	4.410 [3.178-4.741]	4.539 [3.182-5.392]	3.52096	0.171962
HipLeftAddAbd	Kinematic	IQR	6.500 [5.750-11.708]	12.667 [5.667-28.500]	18.417 [7.667-33.917]	3.47529	0.175934
HipLeftAddAbd	Kinematic	Mean	2.552 [-2.246-6.045]	-1.287 [-2.276-16.496]	5.215 [1.448-17.118]	1.34311	0.510914
HipLeftAddAbd	Kinematic	Median	1.667 [-2.417-4.750]	0.333 [-2.667-2.667]	2.667 [-1.333-6.500]	0.674331	0.713791
HipLeftAddAbd	Kinematic	Q05	-3.833 [-8.667--1.646]	-6.000 [-18.700--1.000]	-7.350 [-19.042-0.333]	0.143157	0.930923
HipLeftAddAbd	Kinematic	Q95	8.600 [4.000-34.017]	10.667 [4.667-48.233]	25.617 [12.300-58.333]	3.99533	0.135652
HipLeftAddAbd	Kinematic	Range	14.950 [10.150-37.017]	22.700 [16.300-87.233]	40.667 [25.117-96.608]	4.47052	0.106964
HipLeftAddAbd	Kinematic	Std	4.517 [3.342-11.356]	7.045 [5.224-24.538]	13.083 [7.915-33.329]	4.83765	0.089026
HipLeftFlexExt	Kinematic	IQR	35.708 [29.208-48.417]	55.333 [47.833-62.833]	51.667 [40.208-69.292]	6.49255	0.0389189	0.048033	0.186093	1
HipLeftFlexExt	Kinematic	Mean	59.223 [53.356-65.016]	64.868 [53.642-77.452]	64.091 [59.577-70.566]	1.46029	0.481838
HipLeftFlexExt	Kinematic	Median	59.750 [55.167-64.083]	73.167 [55.000-78.000]	63.000 [58.667-71.167]	1.31214	0.518886
HipLeftFlexExt	Kinematic	Q05	25.367 [18.887-36.208]	20.900 [19.667-24.667]	22.000 [18.333-33.225]	0.0385011	0.980934
HipLeftFlexExt	Kinematic	Q95	84.167 [83.083-95.042]	108.000 [93.550-110.167]	104.100 [99.267-107.717]	7.23801	0.0268094	0.047894	0.0950357	1
HipLeftFlexExt	Kinematic	Range	63.667 [48.083-66.596]	72.667 [68.967-89.667]	81.100 [67.587-100.817]	7.20194	0.0272972	0.0598934	0.0796311	1
HipLeftFlexExt	Kinematic	Std	20.109 [16.767-24.972]	27.281 [25.542-32.546]	28.093 [23.880-35.303]	8.2245	0.0163709	0.0238905	0.0796311	1
HipRightAddAbd	Kinematic	IQR	6.167 [5.167-10.292]	10.167 [4.667-29.000]	18.750 [9.833-54.375]	6.40624	0.0406352	0.758373	0.0410551	0.672435
HipRightAddAbd	Kinematic	Mean	-6.716 [-7.323--5.211]	0.546 [-8.110-4.272]	-8.747 [-26.835--1.808]	2.26088	0.322891
HipRightAddAbd	Kinematic	Median	-5.250 [-6.250--3.750]	-4.000 [-6.333-0.667]	-3.333 [-12.167--0.167]	0.843245	0.655981
HipRightAddAbd	Kinematic	Q05	-15.500 [-16.875--9.175]	-17.300 [-102.417--11.100]	-56.667 [-88.767--19.467]	4.60581	0.0999679
HipRightAddAbd	Kinematic	Q95	0.450 [-0.275-2.025]	17.967 [5.608-47.433]	9.200 [1.000-28.433]	6.88617	0.0319659	0.048033	0.17131	1
HipRightAddAbd	Kinematic	Range	14.875 [11.342-17.750]	58.533 [14.967-108.875]	80.967 [33.350-117.558]	8.75795	0.0125382	0.136366	0.0130366	1
HipRightAddAbd	Kinematic	Std	4.615 [3.941-5.838]	14.746 [4.954-35.900]	25.806 [10.931-42.211]	8.7079	0.0128559	0.282499	0.00829402	1
HipRightFlexExt	Kinematic	IQR	49.583 [32.333-61.833]	76.167 [60.917-86.333]	69.667 [63.708-92.333]	8.57643	0.0137294	0.048033	0.0336508	1
HipRightFlexExt	Kinematic	Mean	38.496 [31.008-45.994]	51.827 [49.019-74.362]	54.437 [46.517-61.835]	11.2828	0.00354787	0.0145463	0.0130366	1
HipRightFlexExt	Kinematic	Median	39.500 [32.750-41.875]	57.000 [56.667-77.000]	56.333 [45.000-61.583]	8.58956	0.0136396	0.074234	0.0248226	1
HipRightFlexExt	Kinematic	Q05	1.650 [-6.000-4.075]	-0.667 [-3.667-3.700]	0.000 [-1.725-7.000]	0.228202	0.892168
HipRightFlexExt	Kinematic	Q95	75.950 [65.383-82.908]	109.000 [93.333-122.333]	107.700 [95.667-128.200]	10.9068	0.0042817	0.00864145	0.0248226	1
HipRightFlexExt	Kinematic	Range	72.117 [65.875-84.217]	107.333 [92.833-123.667]	115.700 [93.917-127.592]	9.22032	0.00995023	0.0238905	0.0372754	1
HipRightFlexExt	Kinematic	Std	26.179 [20.562-30.561]	38.508 [31.975-45.838]	40.464 [33.472-46.250]	9.7573	0.00760727	0.0238905	0.0248226	1
KneeLeftFlexExt	Kinematic	IQR	9.667 [7.500-12.625]	26.833 [14.833-42.000]	20.833 [9.083-37.208]	6.01099	0.0495144	0.0598934	0.272752	1
KneeLeftFlexExt	Kinematic	Mean	21.669 [13.511-30.680]	36.710 [21.524-39.775]	28.602 [17.173-36.549]	1.02853	0.59794
KneeLeftFlexExt	Kinematic	Median	21.167 [13.333-26.750]	29.667 [6.000-36.000]	24.000 [12.083-37.333]	0.0245825	0.987784
KneeLeftFlexExt	Kinematic	Q05	5.650 [2.925-19.583]	6.900 [2.667-12.033]	3.000 [1.833-12.250]	1.12195	0.570652
KneeLeftFlexExt	Kinematic	Q95	48.892 [26.183-51.479]	62.000 [43.767-78.000]	45.950 [32.583-67.025]	1.97981	0.371612
KneeLeftFlexExt	Kinematic	Range	29.600 [20.850-36.596]	49.967 [33.017-64.333]	42.492 [17.792-58.950]	3.64484	0.161634
KneeLeftFlexExt	Kinematic	Std	8.541 [6.604-11.161]	17.604 [10.879-21.146]	16.803 [5.954-19.981]	4.31601	0.115555
KneeRightFlexExt	Kinematic	IQR	43.625 [38.250-69.292]	70.833 [64.833-76.833]	62.333 [56.917-90.333]	5.24296	0.0726952
KneeRightFlexExt	Kinematic	Mean	44.214 [39.410-47.823]	59.670 [46.437-77.338]	57.532 [53.100-67.886]	6.96839	0.0306784	0.165041	0.0372754	1
KneeRightFlexExt	Kinematic	Median	44.667 [38.625-49.000]	53.333 [47.333-85.667]	55.667 [48.167-59.167]	5.29849	0.0707045
KneeRightFlexExt	Kinematic	Q05	7.000 [4.250-14.662]	12.000 [5.667-14.667]	12.000 [5.588-16.008]	1.2184	0.543785
KneeRightFlexExt	Kinematic	Q95	77.750 [73.250-89.900]	107.050 [96.100-134.333]	120.033 [99.450-133.333]	9.4943	0.0086764	0.0238905	0.0304873	1
KneeRightFlexExt	Kinematic	Range	70.167 [65.846-86.650]	88.750 [85.333-122.233]	114.883 [89.442-118.733]	6.62452	0.0364338	0.165041	0.0549729	1
KneeRightFlexExt	Kinematic	Std	24.181 [22.432-32.501]	33.844 [31.197-42.240]	37.122 [32.018-43.865]	5.68151	0.0583815
MLT	Kinematic	IQR	2.851 [2.029-3.455]	4.040 [3.770-7.828]	4.778 [3.618-8.128]	3.93907	0.139522
MLT	Kinematic	Mean	2.516 [1.767-2.878]	5.702 [3.404-7.150]	5.695 [5.156-7.275]	7.68538	0.0214358	0.048033	0.0663111	1
MLT	Kinematic	Median	2.707 [2.269-3.203]	5.107 [3.380-6.265]	5.830 [5.258-6.438]	5.90135	0.0523044
MLT	Kinematic	Q05	-0.027 [-2.473-0.627]	0.779 [0.175-1.218]	1.134 [-2.027-2.412]	2.68796	0.260805
MLT	Kinematic	Q95	6.519 [5.439-7.727]	11.443 [8.835-14.691]	12.070 [10.934-13.621]	4.90388	0.0861264
MLT	Kinematic	Range	7.642 [6.010-8.055]	10.338 [8.660-13.912]	11.410 [7.345-15.060]	2.52218	0.283345
MLT	Kinematic	Std	2.300 [1.843-2.565]	3.533 [2.578-4.167]	3.810 [2.174-4.759]	2.50862	0.285272
ShoulderLeftAddAbd	Kinematic	IQR	26.250 [10.917-34.292]	18.583 [14.000-25.667]	34.000 [19.167-47.583]	3.56997	0.1678
ShoulderLeftAddAbd	Kinematic	Mean	40.802 [33.469-49.468]	18.002 [8.165-24.888]	54.358 [31.773-61.460]	9.35541	0.00930032	0.038289	0.921679	0.0293745
ShoulderLeftAddAbd	Kinematic	Median	42.000 [28.750-52.792]	13.167 [9.667-21.000]	48.667 [34.750-54.083]	9.97232	0.00683184	0.0238905	1	0.018711
ShoulderLeftAddAbd	Kinematic	Q05	12.000 [8.175-17.483]	0.000 [0.000-11.367]	10.033 [4.000-27.467]	4.19282	0.122897
ShoulderLeftAddAbd	Kinematic	Q95	71.983 [57.433-82.892]	42.333 [24.300-60.750]	81.000 [71.179-91.742]	8.08082	0.0175902	0.136366	0.653497	0.0365145
ShoulderLeftAddAbd	Kinematic	Range	54.983 [24.500-69.892]	30.350 [24.300-46.000]	64.983 [49.900-73.908]	4.2645	0.11857
ShoulderLeftAddAbd	Kinematic	Std	18.865 [8.805-21.959]	10.524 [8.895-19.250]	19.335 [16.216-26.451]	3.40777	0.181975
ShoulderLeftFlexExt	Kinematic	IQR	17.917 [3.250-56.250]	70.833 [60.583-76.167]	79.750 [59.396-99.833]	6.73915	0.0344043	0.136366	0.0796311	1
ShoulderLeftFlexExt	Kinematic	Mean	12.911 [-1.267-35.485]	39.009 [33.950-65.366]	53.289 [46.951-56.416]	10.1118	0.00637158	0.0598934	0.0162322	0.672435
ShoulderLeftFlexExt	Kinematic	Median	0.667 [0.000-27.333]	45.000 [16.833-75.667]	50.333 [38.333-55.583]	9.461	0.00882207	0.0592429	0.0160521	1
ShoulderLeftFlexExt	Kinematic	Q05	-11.500 [-13.800--9.912]	-6.000 [-8.000--2.300]	-0.492 [-5.858-0.025]	8.54936	0.0139165	0.0738553	0.0371048	0.859763
ShoulderLeftFlexExt	Kinematic	Q95	67.250 [5.358-97.833]	102.017 [85.333-104.200]	114.400 [109.100-125.250]	10.1781	0.0061639	0.459126	0.0248226	0.0451518
ShoulderLeftFlexExt	Kinematic	Range	65.383 [15.508-116.500]	99.100 [80.867-111.667]	114.800 [109.533-129.275]	4.21126	0.121769
ShoulderLeftFlexExt	Kinematic	Std	20.885 [6.040-38.665]	37.658 [30.881-40.253]	39.885 [38.479-47.492]	5.77973	0.0555836
ShoulderLeftIntraExtra	Kinematic	IQR	18.083 [15.708-34.958]	22.167 [9.167-30.583]	16.167 [11.417-21.792]	0.919987	0.631288
ShoulderLeftIntraExtra	Kinematic	Mean	30.843 [14.116-53.410]	3.211 [-8.994-22.084]	23.616 [-0.536-30.695]	3.01442	0.221528
ShoulderLeftIntraExtra	Kinematic	Median	31.333 [9.750-54.333]	4.333 [-15.333-19.667]	24.667 [-0.292-31.500]	2.74416	0.253578
ShoulderLeftIntraExtra	Kinematic	Q05	1.167 [-35.217-24.833]	-13.333 [-46.000-7.667]	-3.300 [-17.183-8.500]	1.00945	0.603672
ShoulderLeftIntraExtra	Kinematic	Q95	63.333 [36.625-71.875]	21.650 [13.000-47.508]	44.000 [30.500-63.500]	2.7035	0.258786
ShoulderLeftIntraExtra	Kinematic	Range	51.633 [35.808-74.517]	56.967 [29.300-67.650]	50.867 [35.450-64.125]	0.172421	0.917401
ShoulderLeftIntraExtra	Kinematic	Std	15.658 [11.613-21.409]	18.703 [8.468-21.645]	16.258 [12.310-19.620]	0.235256	0.889027
ShoulderRightAddAbd	Kinematic	IQR	24.333 [16.083-27.083]	14.333 [9.667-28.917]	39.000 [26.875-52.333]	7.62032	0.0221446	1	0.134278	0.0365145
ShoulderRightAddAbd	Kinematic	Mean	45.099 [36.487-58.662]	22.855 [19.278-36.609]	67.985 [44.727-78.880]	9.68562	0.00788488	0.237538	0.339307	0.011668
ShoulderRightAddAbd	Kinematic	Median	46.167 [39.917-56.125]	24.333 [16.667-25.917]	61.667 [48.000-73.167]	9.19941	0.0100548	0.136366	0.509118	0.018711
ShoulderRightAddAbd	Kinematic	Q05	12.767 [9.000-16.650]	0.000 [0.000-16.333]	22.050 [0.000-52.183]	3.89532	0.142607
ShoulderRightAddAbd	Kinematic	Q95	73.233 [59.417-85.925]	44.933 [33.667-89.000]	94.000 [85.367-118.983]	8.69311	0.0129514	1	0.0602889	0.0365145
ShoulderRightAddAbd	Kinematic	Range	56.733 [29.950-72.000]	43.333 [32.967-60.900]	75.900 [56.667-92.758]	4.0864	0.129613
ShoulderRightAddAbd	Kinematic	Std	17.321 [10.453-22.352]	12.119 [10.765-20.346]	21.706 [18.108-29.719]	3.90106	0.142199
ShoulderRightFlexExt	Kinematic	IQR	20.000 [3.250-41.875]	74.000 [53.417-80.500]	66.500 [49.250-85.000]	6.3776	0.0412214	0.074234	0.134278	1
ShoulderRightFlexExt	Kinematic	Mean	13.942 [-0.041-43.721]	46.083 [34.090-65.870]	50.669 [41.393-67.883]	6.81031	0.0332017	0.165041	0.0663111	1
ShoulderRightFlexExt	Kinematic	Median	10.333 [0.000-38.583]	51.000 [19.667-82.000]	54.667 [29.500-75.333]	6.33691	0.0420686	0.158668	0.0698241	1
ShoulderRightFlexExt	Kinematic	Q05	-4.183 [-7.350-0.000]	-7.450 [-13.100--2.667]	0.000 [-4.667-0.000]	2.72928	0.255472
ShoulderRightFlexExt	Kinematic	Q95	39.117 [4.675-85.700]	97.667 [81.500-105.333]	101.500 [97.417-115.733]	7.86684	0.0195766	0.164722	0.0304139	1
ShoulderRightFlexExt	Kinematic	Range	39.700 [15.700-74.950]	100.333 [86.333-103.867]	105.400 [96.583-111.233]	6.86698	0.0322741	0.0914585	0.0796311	1
ShoulderRightFlexExt	Kinematic	Std	13.126 [5.557-24.990]	38.927 [31.110-40.794]	36.912 [30.424-40.842]	6.5411	0.0379855	0.0914585	0.095202	1
ShoulderRightIntraExtra	Kinematic	IQR	25.000 [18.333-36.146]	13.667 [8.083-28.833]	19.000 [10.667-25.333]	2.16411	0.338899
ShoulderRightIntraExtra	Kinematic	Mean	30.427 [5.053-51.472]	4.434 [-6.901-11.005]	22.090 [1.606-24.272]	1.40046	0.496472
ShoulderRightIntraExtra	Kinematic	Median	29.500 [13.000-56.500]	5.333 [-11.000-10.333]	20.667 [4.667-25.583]	2.66346	0.26402
ShoulderRightIntraExtra	Kinematic	Q05	-1.333 [-48.092-14.262]	-11.500 [-36.767-3.700]	-6.050 [-43.000-6.100]	0.032245	0.984007
ShoulderRightIntraExtra	Kinematic	Q95	62.833 [34.017-70.917]	12.633 [11.000-51.833]	37.067 [32.425-48.975]	2.91979	0.23226
ShoulderRightIntraExtra	Kinematic	Range	61.033 [52.888-67.858]	28.733 [23.167-82.433]	59.000 [28.425-70.000]	0.909039	0.634753
ShoulderRightIntraExtra	Kinematic	Std	18.672 [15.901-22.472]	9.055 [6.737-28.734]	19.845 [8.856-22.743]	1.13586	0.566697
Trunk Rotation	Kinematic	IQR	3.583 [3.083-4.458]	3.500 [3.333-8.667]	5.333 [5.000-9.667]	2.97521	0.225913
Trunk Rotation	Kinematic	Mean	0.871 [-2.423-2.326]	1.100 [-0.209-1.865]	0.623 [-0.154-3.036]	0.30376	0.859091
Trunk Rotation	Kinematic	Median	0.833 [-2.667-4.083]	0.000 [-0.500-2.000]	0.833 [-1.167-3.000]	0.196636	0.90636
Trunk Rotation	Kinematic	Q05	-3.500 [-9.212--0.825]	-5.000 [-5.667--3.750]	-4.000 [-6.325--2.425]	0.0116839	0.994175
Trunk Rotation	Kinematic	Q95	4.967 [2.475-7.667]	8.917 [3.667-10.967]	7.667 [5.667-9.600]	3.76256	0.152395
Trunk Rotation	Kinematic	Range	7.217 [5.750-11.804]	10.100 [8.333-16.600]	13.000 [9.317-16.200]	1.97548	0.372417
Trunk Rotation	Kinematic	Std	2.366 [1.854-3.409]	2.901 [2.510-5.042]	4.222 [3.115-5.738]	2.58651	0.274376
