# Supplementary material
Source: Research Square preprint supplement (doi:10.21203/rs.3.rs-9449108/v1)
Supplement: Supplementary file 1 [file dc8a32453c34d571ad4a51db.pdf]

The datasets generated and/or analysed during the current study are available in the Slackline Dataset,

Authors/Creators Doronzio, Stefano, repository, [10.5281/zenodo.19812691](https://doi.org/10.5281/zenodo.19812691)
