# Supplementary material
Source: Research Square preprint supplement (doi:10.21203/rs.3.rs-9449108/v1)
Supplement: Supplementary file 2 [file 3d663dd9a89884b5ad7ddd18.xlsx]

## Sheet: Complete_Analysis
Variable	Variable_Type	Metric	Sedentary_Median_IQR	Athletes_Median_IQR	Slackliners_Median_IQR	KW_Statistic	KW_p_value	PostHoc_p_Sed_vs_Ath	PostHoc_p_Sed_vs_Slack	PostHoc_p_Ath_vs_Slack
Cop X	COP	IQR	5.511 [4.792-6.525]	5.489 [5.011-6.722]	5.678 [4.789-6.450]	0.0294689	0.985374
Cop X	COP	Mean	-2.442 [-6.540-4.119]	-9.059 [-12.616-5.084]	-4.072 [-9.032-5.338]	0.726048	0.69557
Cop X	COP	Median	-2.500 [-6.483-4.267]	-9.133 [-12.667-5.233]	-4.289 [-8.822-5.172]	0.712792	0.700195
Cop X	COP	Q05	-12.222 [-18.721--5.097]	-14.016 [-21.427--7.087]	-12.931 [-17.172--0.463]	1.19745	0.549513
Cop X	COP	Q95	5.081 [-0.586-10.892]	-3.598 [-4.833-10.880]	3.191 [-1.383-11.069]	0.954396	0.62052
Cop X	COP	Range	13.483 [11.430-16.798]	12.504 [10.833-17.669]	13.036 [11.558-16.012]	0.2342	0.889496
Cop X	COP	Std	4.124 [3.528-4.817]	3.869 [3.447-5.460]	3.866 [3.509-5.008]	0.0128902	0.993576
Cop Y	COP	IQR	11.650 [11.192-12.547]	7.656 [6.489-9.533]	7.644 [5.950-10.411]	8.18149	0.0167267	0.0186991	0.095202	1
Cop Y	COP	Mean	29.244 [9.149-33.616]	6.920 [4.157-17.136]	10.258 [0.549-16.727]	3.2559	0.196332
Cop Y	COP	Median	28.706 [9.125-33.347]	16.633 [4.433-21.378]	9.700 [1.017-16.656]	3.55694	0.168897
Cop Y	COP	Q05	16.249 [-5.333-20.622]	-3.671 [-11.891-5.469]	-5.580 [-12.256-8.940]	2.27506	0.32061
Cop Y	COP	Q95	42.701 [23.093-46.788]	26.473 [10.973-29.920]	20.802 [13.270-30.747]	5.17887	0.0750623
Cop Y	COP	Range	28.368 [25.547-30.451]	21.800 [15.462-22.902]	18.149 [16.339-26.924]	7.24261	0.0267478	0.048033	0.095202	1
Cop Y	COP	Std	8.529 [7.834-9.198]	6.521 [4.820-6.852]	5.593 [5.020-7.747]	7.97594	0.0185373	0.0238905	0.095202	1
Cell 1	Cell_Normalized	IQR	0.013 [0.012-0.014]	0.009 [0.009-0.010]	0.009 [0.008-0.011]	9.6116	0.00818215	0.00659894	0.0796311	1
Cell 1	Cell_Normalized	Mean	0.281 [0.269-0.300]	0.278 [0.260-0.286]	0.268 [0.260-0.275]	2.43062	0.296619
Cell 1	Cell_Normalized	Median	0.284 [0.270-0.300]	0.276 [0.260-0.285]	0.268 [0.261-0.275]	3.90102	0.142201
Cell 1	Cell_Normalized	Q05	0.261 [0.242-0.283]	0.265 [0.251-0.276]	0.257 [0.246-0.265]	0.787084	0.674663
Cell 1	Cell_Normalized	Q95	0.299 [0.287-0.314]	0.293 [0.269-0.300]	0.281 [0.270-0.289]	4.50493	0.10514
Cell 1	Cell_Normalized	Range	0.032 [0.028-0.041]	0.024 [0.019-0.028]	0.023 [0.019-0.031]	6.74733	0.0342638	0.0914585	0.0796311	1
Cell 1	Cell_Normalized	Std	0.010 [0.008-0.012]	0.007 [0.006-0.009]	0.007 [0.006-0.009]	6.29183	0.0430274	0.112009	0.095202	1
Cell 2	Cell_Normalized	IQR	0.011 [0.010-0.015]	0.009 [0.008-0.010]	0.008 [0.007-0.010]	7.93215	0.0189477	0.048033	0.0549729	1
Cell 2	Cell_Normalized	Mean	0.284 [0.268-0.299]	0.266 [0.255-0.267]	0.262 [0.253-0.283]	3.34896	0.187406
Cell 2	Cell_Normalized	Median	0.288 [0.270-0.299]	0.266 [0.255-0.279]	0.262 [0.253-0.283]	3.60457	0.164921
Cell 2	Cell_Normalized	Q05	0.261 [0.242-0.286]	0.248 [0.243-0.258]	0.253 [0.243-0.274]	0.726048	0.69557
Cell 2	Cell_Normalized	Q95	0.303 [0.285-0.313]	0.277 [0.265-0.293]	0.271 [0.267-0.291]	5.51999	0.0632922
Cell 2	Cell_Normalized	Range	0.026 [0.024-0.036]	0.024 [0.019-0.026]	0.020 [0.017-0.022]	6.77164	0.0338499	0.617002	0.0248226	1
Cell 2	Cell_Normalized	Std	0.008 [0.007-0.011]	0.007 [0.006-0.008]	0.006 [0.005-0.007]	6.79666	0.033429	0.459126	0.0248226	1
Cell 3	Cell_Normalized	IQR	0.012 [0.011-0.016]	0.010 [0.008-0.011]	0.009 [0.007-0.011]	8.0312	0.0180321	0.0598934	0.0453694	1
Cell 3	Cell_Normalized	Mean	0.245 [0.238-0.255]	0.259 [0.255-0.272]	0.258 [0.245-0.264]	1.67135	0.433583
Cell 3	Cell_Normalized	Median	0.245 [0.237-0.255]	0.258 [0.256-0.272]	0.258 [0.245-0.264]	1.82712	0.401093
Cell 3	Cell_Normalized	Q05	0.228 [0.217-0.238]	0.248 [0.243-0.255]	0.247 [0.233-0.253]	5.49946	0.0639452
Cell 3	Cell_Normalized	Q95	0.258 [0.252-0.268]	0.274 [0.271-0.287]	0.269 [0.255-0.277]	3.50604	0.17325
Cell 3	Cell_Normalized	Range	0.026 [0.024-0.039]	0.025 [0.019-0.026]	0.022 [0.019-0.027]	5.05371	0.0799099
Cell 3	Cell_Normalized	Std	0.009 [0.007-0.012]	0.007 [0.006-0.008]	0.007 [0.006-0.008]	5.83436	0.0540861
Cell 4	Cell_Normalized	IQR	0.013 [0.012-0.013]	0.009 [0.008-0.010]	0.009 [0.008-0.011]	9.08171	0.0106643	0.00659894	0.158423	1
Cell 4	Cell_Normalized	Mean	0.237 [0.227-0.246]	0.244 [0.235-0.252]	0.247 [0.234-0.257]	1.27678	0.528142
Cell 4	Cell_Normalized	Median	0.238 [0.226-0.250]	0.241 [0.232-0.252]	0.247 [0.234-0.257]	1.01011	0.603471
Cell 4	Cell_Normalized	Q05	0.218 [0.206-0.227]	0.223 [0.222-0.241]	0.229 [0.224-0.246]	4.23357	0.120418
Cell 4	Cell_Normalized	Q95	0.251 [0.241-0.268]	0.256 [0.245-0.267]	0.258 [0.243-0.272]	0.572499	0.751075
Cell 4	Cell_Normalized	Range	0.031 [0.028-0.038]	0.022 [0.021-0.026]	0.022 [0.019-0.031]	6.30956	0.0426478	0.0598934	0.158423	1
Cell 4	Cell_Normalized	Std	0.009 [0.008-0.012]	0.007 [0.006-0.008]	0.007 [0.006-0.009]	7.68538	0.0214358	0.048033	0.0663111	1
APT	Kinematic	IQR	0.920 [0.741-1.206]	0.593 [0.540-1.023]	0.767 [0.575-0.912]	2.68832	0.260759
APT	Kinematic	Mean	-0.966 [-2.882-0.221]	0.386 [0.040-1.947]	0.135 [-1.288-2.188]	3.60457	0.164921
APT	Kinematic	Median	-1.121 [-2.771--0.027]	0.357 [-0.070-1.663]	0.203 [-1.327-1.785]	3.80468	0.149219
APT	Kinematic	Q05	-2.348 [-3.772--0.926]	-0.287 [-1.347-1.083]	-1.390 [-2.192-0.219]	6.03049	0.0490339	0.048033	0.446583	1
APT	Kinematic	Q95	0.824 [-1.409-1.941]	2.519 [0.527-3.549]	1.674 [-0.251-4.724]	2.66173	0.264249
APT	Kinematic	Range	2.517 [1.756-3.494]	1.435 [0.959-3.009]	2.525 [1.412-2.850]	1.53959	0.463108
APT	Kinematic	Std	0.774 [0.541-1.042]	0.429 [0.319-0.946]	0.775 [0.437-0.855]	1.6801	0.431688
ElbowLeftFlexExt	Kinematic	IQR	7.667 [4.167-11.167]	3.000 [1.667-3.333]	6.333 [4.167-10.333]	4.07351	0.130452
ElbowLeftFlexExt	Kinematic	Mean	44.739 [27.267-51.403]	32.443 [23.553-44.343]	41.293 [34.449-46.957]	1.04974	0.591633
ElbowLeftFlexExt	Kinematic	Median	44.167 [26.750-51.083]	31.000 [23.667-43.000]	40.000 [34.167-47.500]	0.99218	0.608907
ElbowLeftFlexExt	Kinematic	Q05	31.867 [14.533-39.417]	29.000 [21.667-39.333]	33.000 [27.167-38.000]	0.0667597	0.967171
ElbowLeftFlexExt	Kinematic	Q95	58.100 [40.417-64.650]	39.667 [26.333-58.200]	49.000 [39.767-65.333]	2.03871	0.360828
ElbowLeftFlexExt	Kinematic	Range	23.500 [11.417-29.392]	7.867 [6.333-16.000]	16.533 [9.533-24.367]	3.12809	0.209288
ElbowLeftFlexExt	Kinematic	Std	7.022 [3.797-8.813]	4.187 [1.988-5.161]	4.960 [3.565-7.472]	2.51507	0.284354
ElbowRightFlexExt	Kinematic	IQR	7.500 [5.875-10.000]	3.000 [2.333-5.333]	9.000 [5.500-12.000]	4.93255	0.0849007
ElbowRightFlexExt	Kinematic	Mean	41.092 [23.278-51.254]	32.909 [20.254-39.467]	42.547 [40.426-53.931]	4.3673	0.11263
ElbowRightFlexExt	Kinematic	Median	41.333 [21.333-50.833]	32.667 [19.667-39.667]	42.667 [39.667-53.000]	3.60919	0.164541
ElbowRightFlexExt	Kinematic	Q05	26.500 [14.417-40.667]	29.333 [18.667-35.667]	34.333 [31.133-38.833]	2.20457	0.332111
ElbowRightFlexExt	Kinematic	Q95	56.667 [47.167-66.150]	40.000 [36.667-43.333]	57.000 [47.500-70.767]	6.12194	0.0468422	0.112009	1	0.100194
ElbowRightFlexExt	Kinematic	Range	26.167 [16.150-33.817]	11.667 [7.667-22.000]	24.733 [13.767-33.967]	4.85528	0.0882451
ElbowRightFlexExt	Kinematic	Std	7.344 [5.369-9.978]	3.648 [2.587-6.998]	7.173 [4.143-10.222]	2.59197	0.273628
HeadFlexExt	Kinematic	IQR	2.000 [1.750-2.333]	1.667 [1.667-2.000]	2.667 [2.333-3.167]	4.93584	0.0847612
HeadFlexExt	Kinematic	Mean	2.033 [-0.471-12.384]	-2.627 [-6.217-4.454]	2.712 [-4.159-10.710]	1.11683	0.572114
HeadFlexExt	Kinematic	Median	2.250 [-0.333-12.250]	-2.667 [-6.000-3.000]	2.000 [-4.167-10.833]	1.26831	0.530384
HeadFlexExt	Kinematic	Q05	0.167 [-3.317-8.950]	-4.333 [-8.000-0.800]	0.333 [-7.333-6.333]	1.47152	0.479141
HeadFlexExt	Kinematic	Q95	4.833 [2.250-15.458]	-0.667 [-4.333-15.533]	6.333 [-0.900-14.833]	0.932118	0.62747
HeadFlexExt	Kinematic	Range	5.417 [4.083-7.200]	4.000 [3.667-5.000]	6.200 [5.933-6.833]	4.22486	0.120944
HeadFlexExt	Kinematic	Std	1.885 [1.257-2.847]	1.476 [1.197-1.853]	2.128 [1.814-2.405]	2.77805	0.249318
HeadLatFlex	Kinematic	IQR	2.333 [1.417-3.500]	1.667 [1.333-2.667]	2.000 [1.833-2.500]	1.81516	0.403499
HeadLatFlex	Kinematic	Mean	1.957 [-1.278-2.866]	-0.247 [-1.161-2.095]	-2.146 [-5.111-0.564]	3.29314	0.19271
HeadLatFlex	Kinematic	Median	1.667 [-1.333-2.750]	0.000 [-1.000-2.000]	-2.000 [-5.167-0.667]	3.32476	0.189687
HeadLatFlex	Kinematic	Q05	-3.100 [-5.500-0.533]	-2.333 [-3.333-0.000]	-4.533 [-6.667--2.000]	3.15647	0.206339
HeadLatFlex	Kinematic	Q95	6.167 [1.383-7.917]	2.333 [1.333-4.000]	0.667 [-3.500-3.333]	3.25155	0.196759
HeadLatFlex	Kinematic	Range	6.600 [4.083-9.775]	4.333 [3.667-5.667]	5.333 [4.767-6.333]	2.80144	0.246419
HeadLatFlex	Kinematic	Std	2.031 [1.353-3.168]	1.505 [1.172-1.829]	1.786 [1.520-2.189]	2.6672	0.263527
HipLeftAddAbd	Kinematic	IQR	2.833 [1.333-4.917]	2.000 [1.000-2.667]	3.333 [1.500-4.667]	1.4999	0.47239
HipLeftAddAbd	Kinematic	Mean	-2.039 [-4.255--0.905]	-2.791 [-3.784--1.888]	-3.505 [-6.608--2.747]	3.0457	0.21809
HipLeftAddAbd	Kinematic	Median	-2.000 [-3.917--0.833]	-2.667 [-3.667--1.333]	-3.333 [-5.667--2.833]	2.98793	0.22448
HipLeftAddAbd	Kinematic	Q05	-6.150 [-11.300--3.500]	-6.333 [-7.000--5.667]	-6.333 [-12.267--4.667]	0.606683	0.738347
HipLeftAddAbd	Kinematic	Q95	0.333 [-0.133-2.750]	0.667 [-0.667-2.000]	0.000 [-1.833-1.933]	1.10289	0.576116
HipLeftAddAbd	Kinematic	Range	6.650 [3.317-13.617]	6.333 [2.667-9.200]	8.200 [3.600-14.000]	0.881675	0.643497
HipLeftAddAbd	Kinematic	Std	3.038 [1.119-4.756]	2.043 [0.885-2.530]	2.753 [1.529-3.985]	1.29946	0.522187
HipLeftFlexExt	Kinematic	IQR	1.583 [1.333-2.500]	1.000 [0.667-1.333]	1.667 [1.167-2.333]	4.56198	0.102183
HipLeftFlexExt	Kinematic	Mean	3.461 [-2.188-6.424]	0.539 [-2.148-5.947]	13.653 [2.591-21.796]	3.66818	0.159759
HipLeftFlexExt	Kinematic	Median	3.167 [-2.083-6.250]	0.667 [-2.000-5.667]	13.333 [2.500-22.167]	3.34875	0.187426
HipLeftFlexExt	Kinematic	Q05	1.833 [-5.250-3.167]	-0.333 [-3.000-4.467]	13.000 [0.500-17.900]	4.03602	0.13292
HipLeftFlexExt	Kinematic	Q95	5.333 [0.667-10.583]	4.333 [-0.667-8.333]	15.000 [4.833-24.500]	3.19178	0.202728
HipLeftFlexExt	Kinematic	Range	4.667 [3.417-8.000]	2.667 [2.000-3.867]	4.867 [2.500-6.333]	3.30716	0.191364
HipLeftFlexExt	Kinematic	Std	1.866 [1.162-3.293]	0.961 [0.624-2.218]	1.403 [1.225-2.256]	3.06118	0.216408
HipRightAddAbd	Kinematic	IQR	2.833 [1.417-4.500]	2.333 [1.000-3.000]	3.333 [1.500-3.500]	1.13888	0.565843
HipRightAddAbd	Kinematic	Mean	-2.796 [-3.701--1.013]	-2.635 [-3.882--0.334]	-1.792 [-4.310-4.421]	0.342639	0.842552
HipRightAddAbd	Kinematic	Median	-2.833 [-3.500--1.542]	-2.667 [-3.667--1.000]	-2.000 [-4.333-4.167]	0.738365	0.691299
HipRightAddAbd	Kinematic	Q05	-6.100 [-8.750--4.250]	-5.333 [-6.667--3.667]	-6.200 [-7.600--3.333]	0.524571	0.769291
HipRightAddAbd	Kinematic	Q95	1.583 [-1.583-2.875]	1.000 [-1.667-2.333]	2.333 [-1.833-8.000]	0.527979	0.767982
HipRightAddAbd	Kinematic	Range	6.750 [3.567-12.650]	8.000 [3.000-9.500]	7.667 [3.933-13.833]	0.686656	0.709405
HipRightAddAbd	Kinematic	Std	2.731 [1.220-4.707]	2.397 [0.904-2.752]	2.737 [1.550-3.803]	1.54892	0.460952
HipRightFlexExt	Kinematic	IQR	2.250 [1.083-2.667]	1.333 [1.000-1.333]	1.667 [1.000-2.000]	2.4798	0.289414
HipRightFlexExt	Kinematic	Mean	-8.727 [-11.087--3.544]	-8.240 [-11.709--2.118]	5.980 [-3.998-10.667]	6.05619	0.0484078	1	0.0549729	0.283915
HipRightFlexExt	Kinematic	Median	-8.667 [-11.500--4.125]	-8.000 [-11.667--2.333]	5.667 [-4.167-10.833]	6.31125	0.0426117	1	0.0452707	0.283543
HipRightFlexExt	Kinematic	Q05	-10.167 [-14.000--6.500]	-9.667 [-13.000--4.000]	2.000 [-5.767-7.333]	7.12001	0.0284387	1	0.0247599	0.283915
HipRightFlexExt	Kinematic	Q95	-6.500 [-8.417-0.000]	-7.000 [-10.333-1.333]	8.333 [-1.833-17.600]	6.023	0.0492178	1	0.0725689	0.204742
HipRightFlexExt	Kinematic	Range	4.917 [2.750-8.417]	2.667 [2.333-5.333]	4.333 [3.167-5.833]	2.41299	0.299244
HipRightFlexExt	Kinematic	Std	1.890 [1.014-3.391]	0.882 [0.662-2.052]	1.357 [1.178-1.871]	2.42149	0.297975
KneeLeftFlexExt	Kinematic	IQR	1.667 [1.333-2.833]	1.667 [0.667-2.000]	3.000 [1.500-3.833]	1.73093	0.420856
KneeLeftFlexExt	Kinematic	Mean	9.154 [4.997-15.227]	7.075 [3.980-23.206]	13.457 [11.561-32.860]	2.74552	0.253407
KneeLeftFlexExt	Kinematic	Median	8.833 [3.917-14.833]	7.333 [4.000-23.333]	13.667 [11.667-33.667]	2.484	0.288806
KneeLeftFlexExt	Kinematic	Q05	6.833 [2.750-13.083]	5.000 [3.667-16.667]	11.000 [8.333-28.167]	2.37699	0.304679
KneeLeftFlexExt	Kinematic	Q95	15.833 [9.667-20.517]	9.000 [4.333-28.200]	19.333 [13.500-37.933]	3.01647	0.2213
KneeLeftFlexExt	Kinematic	Range	8.167 [3.167-10.667]	4.000 [1.000-5.000]	6.000 [4.000-9.500]	2.66162	0.264263
KneeLeftFlexExt	Kinematic	Std	2.419 [1.269-3.426]	1.245 [0.415-1.505]	2.078 [1.373-2.802]	2.88023	0.2369
KneeRightFlexExt	Kinematic	IQR	2.000 [1.000-4.500]	1.667 [1.000-2.333]	2.667 [1.500-3.000]	0.753121	0.686218
KneeRightFlexExt	Kinematic	Mean	10.075 [4.974-17.007]	11.165 [2.936-13.785]	21.039 [7.985-34.680]	1.78963	0.408684
KneeRightFlexExt	Kinematic	Median	10.167 [3.833-17.167]	12.333 [3.000-13.667]	20.333 [7.667-33.833]	1.47015	0.479469
KneeRightFlexExt	Kinematic	Q05	7.833 [2.375-13.417]	6.667 [2.000-11.333]	17.667 [6.167-28.000]	2.87152	0.237935
KneeRightFlexExt	Kinematic	Q95	12.500 [11.583-28.217]	14.333 [4.333-16.333]	26.667 [10.167-38.500]	0.943225	0.623995
KneeRightFlexExt	Kinematic	Range	7.167 [2.917-12.042]	4.333 [2.667-5.000]	5.867 [3.667-7.667]	2.13572	0.343743
KneeRightFlexExt	Kinematic	Std	2.430 [1.248-4.039]	1.413 [0.909-1.944]	1.781 [1.307-2.492]	1.40046	0.496472
MLT	Kinematic	IQR	2.312 [1.262-3.487]	1.327 [0.717-2.397]	2.197 [0.972-3.107]	1.63479	0.441581
MLT	Kinematic	Mean	-0.967 [-1.589-0.233]	-0.166 [-0.257--0.028]	0.765 [-0.331-3.480]	3.92859	0.140255
MLT	Kinematic	Median	-1.215 [-1.495-0.467]	-0.197 [-0.483-0.030]	0.780 [-0.207-3.295]	4.63924	0.0983107
MLT	Kinematic	Q05	-3.260 [-5.073--2.403]	-1.849 [-3.417--1.260]	-2.363 [-4.406--0.109]	2.80985	0.245385
MLT	Kinematic	Q95	2.345 [-0.021-5.813]	2.015 [0.815-2.604]	1.970 [1.385-7.769]	0.946888	0.622853
MLT	Kinematic	Range	6.303 [2.511-10.875]	5.275 [2.465-6.101]	4.333 [2.544-10.868]	0.560821	0.755474
MLT	Kinematic	Std	1.779 [0.812-3.366]	1.609 [0.707-1.891]	1.510 [0.779-3.151]	0.965539	0.617072
ShoulderLeftAddAbd	Kinematic	IQR	11.083 [2.833-19.500]	2.667 [2.333-3.667]	6.000 [3.667-7.667]	1.81515	0.403502
ShoulderLeftAddAbd	Kinematic	Mean	66.865 [55.677-73.978]	73.450 [69.912-80.492]	85.871 [75.829-97.242]	8.78839	0.0123488	0.237538	0.0304873	0.241706
ShoulderLeftAddAbd	Kinematic	Median	64.833 [56.833-74.875]	75.333 [70.000-80.333]	86.000 [75.833-98.333]	8.89002	0.011737	0.282499	0.0335717	0.157581
ShoulderLeftAddAbd	Kinematic	Q05	39.700 [29.175-64.583]	66.667 [58.933-71.000]	83.000 [64.733-86.233]	8.00659	0.0182554	0.198221	0.0372754	0.513897
ShoulderLeftAddAbd	Kinematic	Q95	80.667 [77.592-88.633]	81.333 [75.200-87.333]	92.333 [87.167-108.867]	4.22247	0.121088
ShoulderLeftAddAbd	Kinematic	Range	33.050 [6.917-48.692]	6.333 [5.667-25.000]	21.000 [13.700-25.333]	1.89847	0.387037
ShoulderLeftAddAbd	Kinematic	Std	12.025 [2.191-15.237]	3.168 [1.731-6.918]	6.625 [3.915-8.064]	2.41185	0.299415
ShoulderLeftFlexExt	Kinematic	IQR	1.000 [0.000-3.000]	0.000 [0.000-0.000]	0.000 [0.000-25.000]	5.16367	0.0756352
ShoulderLeftFlexExt	Kinematic	Mean	0.000 [-0.672-1.591]	0.000 [0.000-0.114]	0.913 [0.000-15.236]	2.6762	0.262343
ShoulderLeftFlexExt	Kinematic	Median	0.000 [0.000-0.000]	0.000 [0.000-0.000]	0.000 [0.000-0.000]	2.21656	0.330126
ShoulderLeftFlexExt	Kinematic	Q05	-5.000 [-8.333--0.833]	0.000 [-2.333-0.000]	0.000 [0.000-0.000]	8.52555	0.0140831	0.172319	0.0260658	0.90856
ShoulderLeftFlexExt	Kinematic	Q95	0.000 [0.000-16.850]	0.000 [0.000-0.000]	0.000 [0.000-55.100]	1.55928	0.458572
ShoulderLeftFlexExt	Kinematic	Range	10.500 [1.583-24.017]	0.000 [0.000-2.333]	4.333 [0.000-56.000]	1.85286	0.395964
ShoulderLeftFlexExt	Kinematic	Std	4.938 [0.560-13.708]	1.393 [0.000-4.901]	6.715 [1.488-24.044]	2.72312	0.25626
ShoulderLeftIntraExtra	Kinematic	IQR	10.000 [4.083-19.583]	2.667 [1.667-4.667]	8.000 [3.333-22.667]	3.31539	0.190578
ShoulderLeftIntraExtra	Kinematic	Mean	47.709 [34.214-57.601]	56.294 [45.044-60.790]	39.117 [29.395-58.783]	1.83056	0.400404
ShoulderLeftIntraExtra	Kinematic	Median	55.167 [36.750-59.083]	57.000 [47.667-60.667]	39.667 [33.667-59.167]	1.95576	0.376108
ShoulderLeftIntraExtra	Kinematic	Q05	22.467 [6.750-42.033]	52.800 [17.667-57.333]	23.133 [1.167-49.900]	1.84457	0.397609
ShoulderLeftIntraExtra	Kinematic	Q95	66.000 [46.917-84.083]	58.667 [58.333-64.333]	47.667 [42.167-62.167]	2.6784	0.262055
ShoulderLeftIntraExtra	Kinematic	Range	26.167 [8.850-53.017]	7.000 [5.867-33.000]	21.200 [9.467-52.367]	0.947732	0.622591
ShoulderLeftIntraExtra	Kinematic	Std	10.176 [3.517-17.214]	3.623 [2.058-10.979]	8.837 [4.130-16.538]	0.780059	0.677037
ShoulderRightAddAbd	Kinematic	IQR	8.667 [5.125-25.667]	4.000 [3.333-5.000]	8.333 [5.000-12.167]	3.24717	0.197191
ShoulderRightAddAbd	Kinematic	Mean	70.039 [61.845-73.796]	80.230 [70.857-81.981]	91.523 [78.244-96.807]	8.66276	0.0131494	0.198578	0.0304873	0.331836
ShoulderRightAddAbd	Kinematic	Median	69.833 [62.125-72.417]	80.000 [74.000-82.333]	91.333 [78.500-95.333]	9.91245	0.00703946	0.136366	0.016097	0.331434
ShoulderRightAddAbd	Kinematic	Q05	51.733 [34.167-60.517]	70.000 [53.667-76.133]	79.667 [62.400-87.333]	10.6358	0.00490305	0.074234	0.0103906	0.589031
ShoulderRightAddAbd	Kinematic	Q95	81.167 [73.583-89.800]	81.000 [77.333-86.200]	106.333 [84.833-110.500]	2.89407	0.235267
ShoulderRightAddAbd	Kinematic	Range	25.967 [15.917-55.750]	10.333 [9.000-23.667]	20.667 [14.333-33.933]	2.38698	0.303161
ShoulderRightAddAbd	Kinematic	Std	7.827 [4.691-16.803]	3.685 [2.889-7.530]	7.653 [4.578-10.202]	1.97915	0.371735
ShoulderRightFlexExt	Kinematic	IQR	0.000 [0.000-4.833]	0.000 [0.000-0.000]	0.000 [0.000-22.000]	0.488711	0.783209
ShoulderRightFlexExt	Kinematic	Mean	-0.082 [-0.344-4.107]	-0.031 [-0.043-0.000]	0.560 [-0.020-17.378]	2.7086	0.258128
ShoulderRightFlexExt	Kinematic	Median	0.000 [0.000-0.333]	0.000 [0.000-0.000]	0.000 [0.000-0.000]	5.38993	0.0675447
ShoulderRightFlexExt	Kinematic	Q05	-2.333 [-4.667--1.417]	0.000 [-2.000-0.000]	0.000 [-2.000-0.000]	4.80972	0.0902781
ShoulderRightFlexExt	Kinematic	Q95	2.600 [0.000-20.317]	0.000 [0.000-3.333]	0.000 [0.000-96.333]	0.53775	0.764239
ShoulderRightFlexExt	Kinematic	Range	11.767 [2.167-23.600]	0.000 [0.000-7.733]	4.333 [0.000-97.833]	1.63073	0.442478
ShoulderRightFlexExt	Kinematic	Std	4.036 [1.641-8.713]	1.572 [0.260-3.203]	5.768 [0.867-32.486]	1.56727	0.456743
ShoulderRightIntraExtra	Kinematic	IQR	7.750 [5.125-23.917]	3.000 [2.000-4.000]	15.000 [5.500-27.667]	3.36546	0.185866
ShoulderRightIntraExtra	Kinematic	Mean	43.564 [38.267-60.627]	58.832 [53.418-65.170]	41.295 [28.812-51.237]	6.49516	0.0388682	0.811032	0.735834	0.0293745
ShoulderRightIntraExtra	Kinematic	Median	49.500 [38.833-63.250]	62.667 [55.000-66.667]	44.667 [31.000-51.833]	6.96817	0.0306818	0.757747	0.825189	0.0186526
ShoulderRightIntraExtra	Kinematic	Q05	25.367 [6.117-33.500]	47.000 [35.667-62.000]	12.133 [-20.500-39.900]	5.14673	0.0762783
ShoulderRightIntraExtra	Kinematic	Q95	62.167 [54.167-72.625]	69.000 [62.333-71.000]	56.000 [46.833-58.000]	6.59002	0.0370678	1	0.577567	0.0147179
ShoulderRightIntraExtra	Kinematic	Range	40.517 [9.750-61.742]	15.867 [6.667-28.333]	43.200 [12.433-67.933]	2.66704	0.263547
ShoulderRightIntraExtra	Kinematic	Std	12.324 [3.334-19.043]	7.053 [2.860-10.069]	12.923 [4.153-21.237]	1.39695	0.497343
Trunk Rotation	Kinematic	IQR	1.583 [1.083-2.750]	1.000 [0.667-1.333]	1.000 [0.667-1.500]	3.145	0.207525
Trunk Rotation	Kinematic	Mean	-0.566 [-1.711-2.621]	3.068 [1.557-4.291]	2.838 [-0.866-3.258]	1.98534	0.370586
Trunk Rotation	Kinematic	Median	0.333 [-1.000-3.333]	3.000 [1.333-4.333]	2.667 [-1.000-3.167]	1.26186	0.532096
Trunk Rotation	Kinematic	Q05	-2.500 [-3.800--1.667]	1.667 [0.333-2.333]	0.333 [-2.167-1.667]	5.74711	0.0564977
Trunk Rotation	Kinematic	Q95	3.600 [0.250-6.500]	4.333 [3.667-5.667]	3.667 [1.667-5.833]	0.0824672	0.959605
Trunk Rotation	Kinematic	Range	4.167 [2.500-9.917]	3.333 [2.333-4.000]	4.000 [2.000-6.500]	1.87936	0.390753
Trunk Rotation	Kinematic	Std	1.510 [0.799-3.977]	0.901 [0.715-1.350]	1.099 [0.571-1.995]	2.52753	0.282588
