# Supplementary material
Source: Research Square preprint supplement (doi:10.21203/rs.3.rs-9449108/v1)
Supplement: Supplementary file 3 [file 74f7104d79b6ff3b16fcef47.xlsx]

## Sheet: Complete_Analysis
Variable	Variable_Type	Metric	Sedentary_Median_IQR	Athletes_Median_IQR	Slackliners_Median_IQR	KW_Statistic	KW_p_value	PostHoc_p_Sed_vs_Ath	PostHoc_p_Sed_vs_Slack	PostHoc_p_Ath_vs_Slack
Cop X	COP	IQR	5.072 [4.578-5.961]	4.500 [3.567-5.622]	5.911 [4.444-6.272]	2.65043	0.265746
Cop X	COP	Mean	2.323 [-5.995-3.110]	1.901 [-0.796-7.094]	0.249 [-4.679-6.880]	0.150212	0.927645
Cop X	COP	Median	2.278 [-5.542-2.869]	2.044 [-1.167-6.367]	0.433 [-4.417-6.950]	0.22827	0.892138
Cop X	COP	Q05	-4.913 [-12.700--3.498]	-3.573 [-5.387--1.200]	-4.907 [-14.420--0.349]	1.36845	0.504482
Cop X	COP	Q95	8.704 [-0.335-9.697]	5.904 [5.509-14.367]	6.887 [3.500-13.146]	0.0246204	0.987765
Cop X	COP	Range	12.764 [11.857-13.688]	10.744 [9.504-12.644]	13.456 [11.238-15.324]	3.74368	0.15384
Cop X	COP	Std	3.755 [3.484-4.135]	3.300 [2.868-3.878]	4.094 [3.570-4.431]	3.45677	0.177571
Cop Y	COP	IQR	7.633 [6.508-9.281]	7.278 [5.556-8.178]	7.033 [6.317-7.794]	0.157563	0.924242
Cop Y	COP	Mean	0.327 [-7.578-14.461]	-0.713 [-5.579-4.943]	-3.384 [-9.495-7.363]	0.722959	0.696645
Cop Y	COP	Median	-0.033 [-7.375-14.217]	-0.322 [-5.300-4.944]	-3.678 [-8.489-6.661]	0.790486	0.673517
Cop Y	COP	Q05	-8.062 [-16.288-3.376]	-9.429 [-13.029--4.653]	-9.178 [-19.053--1.123]	0.559413	0.756005
Cop Y	COP	Q95	9.186 [1.485-22.727]	7.987 [-0.293-13.907]	3.496 [-2.161-16.181]	0.765187	0.68209
Cop Y	COP	Range	18.877 [14.756-20.948]	18.929 [13.787-20.856]	16.022 [14.677-19.347]	0.28739	0.866152
Cop Y	COP	Std	5.621 [4.640-6.716]	5.778 [4.437-6.268]	5.125 [4.760-5.602]	0.508961	0.775319
Cell 1	Cell_Normalized	IQR	0.010 [0.008-0.010]	0.008 [0.006-0.011]	0.008 [0.007-0.009]	1.17701	0.555157
Cell 1	Cell_Normalized	Mean	0.256 [0.246-0.278]	0.255 [0.247-0.257]	0.254 [0.246-0.258]	0.644718	0.724438
Cell 1	Cell_Normalized	Median	0.255 [0.246-0.279]	0.254 [0.247-0.257]	0.254 [0.246-0.258]	0.44868	0.799043
Cell 1	Cell_Normalized	Q05	0.245 [0.237-0.266]	0.243 [0.237-0.251]	0.243 [0.237-0.247]	0.482568	0.785619
Cell 1	Cell_Normalized	Q95	0.268 [0.256-0.291]	0.262 [0.258-0.269]	0.263 [0.256-0.271]	0.677563	0.712638
Cell 1	Cell_Normalized	Range	0.022 [0.021-0.023]	0.021 [0.016-0.024]	0.020 [0.018-0.023]	0.235256	0.889027
Cell 1	Cell_Normalized	Std	0.007 [0.006-0.007]	0.006 [0.005-0.007]	0.006 [0.006-0.007]	0.41031	0.814521
Cell 2	Cell_Normalized	IQR	0.009 [0.008-0.010]	0.008 [0.007-0.009]	0.008 [0.007-0.010]	0.925396	0.629583
Cell 2	Cell_Normalized	Mean	0.260 [0.255-0.288]	0.263 [0.260-0.271]	0.259 [0.254-0.274]	1.02794	0.598115
Cell 2	Cell_Normalized	Median	0.260 [0.255-0.288]	0.262 [0.260-0.271]	0.258 [0.254-0.273]	0.856422	0.651674
Cell 2	Cell_Normalized	Q05	0.247 [0.244-0.275]	0.255 [0.249-0.262]	0.251 [0.240-0.262]	0.695015	0.706447
Cell 2	Cell_Normalized	Q95	0.271 [0.266-0.300]	0.274 [0.271-0.281]	0.268 [0.265-0.286]	1.20527	0.547369
Cell 2	Cell_Normalized	Range	0.022 [0.020-0.024]	0.021 [0.018-0.023]	0.021 [0.017-0.022]	0.937713	0.625717
Cell 2	Cell_Normalized	Std	0.007 [0.006-0.007]	0.006 [0.005-0.007]	0.006 [0.005-0.007]	0.896305	0.638807
Cell 3	Cell_Normalized	IQR	0.009 [0.009-0.010]	0.009 [0.007-0.010]	0.009 [0.009-0.010]	0.599987	0.740823
Cell 3	Cell_Normalized	Mean	0.265 [0.252-0.276]	0.264 [0.249-0.276]	0.268 [0.257-0.271]	0.000651678	0.999674
Cell 3	Cell_Normalized	Median	0.265 [0.251-0.276]	0.263 [0.249-0.277]	0.268 [0.256-0.271]	0.001942	0.999029
Cell 3	Cell_Normalized	Q05	0.253 [0.241-0.265]	0.254 [0.239-0.266]	0.257 [0.245-0.260]	0.016292	0.991887
Cell 3	Cell_Normalized	Q95	0.277 [0.266-0.288]	0.276 [0.259-0.286]	0.278 [0.270-0.283]	0.0623135	0.969324
Cell 3	Cell_Normalized	Range	0.023 [0.021-0.026]	0.023 [0.020-0.025]	0.021 [0.020-0.025]	0.101935	0.950309
Cell 3	Cell_Normalized	Std	0.007 [0.007-0.007]	0.007 [0.006-0.007]	0.007 [0.006-0.008]	0.806126	0.66827
Cell 4	Cell_Normalized	IQR	0.010 [0.009-0.011]	0.009 [0.007-0.010]	0.009 [0.008-0.011]	0.886556	0.641929
Cell 4	Cell_Normalized	Mean	0.261 [0.252-0.267]	0.263 [0.253-0.273]	0.264 [0.256-0.266]	0.0781232	0.961691
Cell 4	Cell_Normalized	Median	0.260 [0.251-0.267]	0.264 [0.252-0.273]	0.263 [0.256-0.267]	0.124093	0.939839
Cell 4	Cell_Normalized	Q05	0.249 [0.241-0.258]	0.248 [0.239-0.261]	0.253 [0.243-0.255]	0.0623135	0.969324
Cell 4	Cell_Normalized	Q95	0.273 [0.265-0.276]	0.272 [0.266-0.284]	0.275 [0.268-0.277]	0.0447572	0.97787
Cell 4	Cell_Normalized	Range	0.024 [0.022-0.025]	0.023 [0.020-0.026]	0.023 [0.022-0.026]	0.23566	0.888847
Cell 4	Cell_Normalized	Std	0.008 [0.007-0.008]	0.007 [0.006-0.008]	0.007 [0.007-0.008]	0.557654	0.756671
APT	Kinematic	IQR	0.422 [0.373-0.472]	0.407 [0.343-0.550]	0.427 [0.415-0.533]	0.81766	0.664427
APT	Kinematic	Mean	-2.960 [-3.931--1.224]	-1.136 [-1.292-0.281]	-1.061 [-2.318--1.016]	4.31038	0.115881
APT	Kinematic	Median	-2.965 [-3.946--1.220]	-1.130 [-1.237-0.300]	-1.123 [-2.293--1.060]	4.52068	0.104315
APT	Kinematic	Q05	-3.519 [-4.421--1.811]	-1.567 [-2.091--0.293]	-1.855 [-2.823--1.495]	5.5776	0.0614951
APT	Kinematic	Q95	-2.362 [-3.426--0.791]	-0.593 [-0.697-0.637]	-0.493 [-1.730--0.213]	6.60272	0.036833	0.074234	0.158423	1
APT	Kinematic	Range	1.049 [0.840-1.277]	0.953 [0.870-1.047]	1.225 [0.984-1.404]	2.09743	0.350388
APT	Kinematic	Std	0.323 [0.246-0.380]	0.296 [0.280-0.334]	0.351 [0.306-0.456]	2.66569	0.263726
ElbowLeftFlexExt	Kinematic	IQR	1.000 [0.750-1.333]	1.333 [1.000-1.333]	1.333 [1.000-2.167]	2.02699	0.362949
ElbowLeftFlexExt	Kinematic	Mean	27.593 [26.408-31.991]	34.595 [25.394-35.223]	28.697 [28.024-33.921]	0.733868	0.692855
ElbowLeftFlexExt	Kinematic	Median	27.500 [26.000-32.083]	34.333 [25.333-35.333]	28.333 [27.333-33.667]	0.675361	0.713423
ElbowLeftFlexExt	Kinematic	Q05	26.000 [23.700-29.333]	32.667 [24.000-34.000]	27.000 [25.000-32.500]	2.02351	0.36358
ElbowLeftFlexExt	Kinematic	Q95	30.233 [28.667-33.333]	36.000 [26.667-36.667]	34.333 [29.167-36.167]	0.387319	0.823938
ElbowLeftFlexExt	Kinematic	Range	3.167 [2.750-3.967]	2.667 [2.333-3.000]	3.333 [2.333-4.433]	1.32582	0.51535
ElbowLeftFlexExt	Kinematic	Std	1.248 [1.192-1.537]	0.941 [0.745-1.047]	1.417 [1.057-2.644]	5.22595	0.0733161
ElbowRightFlexExt	Kinematic	IQR	1.333 [1.083-1.667]	1.000 [1.000-1.333]	1.667 [1.167-2.000]	4.54019	0.103303
ElbowRightFlexExt	Kinematic	Mean	29.203 [25.593-32.369]	36.366 [29.043-39.055]	31.755 [28.840-34.972]	3.4514	0.178048
ElbowRightFlexExt	Kinematic	Median	29.333 [25.583-32.250]	36.333 [29.000-39.000]	31.667 [28.667-35.000]	4.46597	0.107208
ElbowRightFlexExt	Kinematic	Q05	24.167 [22.667-30.500]	35.000 [28.000-38.000]	28.333 [25.667-33.000]	6.20355	0.0449692	0.0740446	1	0.20412
ElbowRightFlexExt	Kinematic	Q95	31.167 [27.333-33.333]	38.667 [30.667-40.333]	36.333 [31.333-37.167]	2.33323	0.31142
ElbowRightFlexExt	Kinematic	Range	3.333 [2.583-3.667]	2.333 [2.000-4.000]	3.333 [3.000-4.100]	1.88024	0.39058
ElbowRightFlexExt	Kinematic	Std	1.252 [1.056-1.468]	0.729 [0.699-1.129]	1.351 [1.027-2.852]	4.59191	0.100665
HeadFlexExt	Kinematic	IQR	1.833 [1.667-2.250]	1.333 [1.333-1.333]	1.667 [1.333-2.000]	4.18713	0.123247
HeadFlexExt	Kinematic	Mean	13.345 [4.869-18.311]	3.879 [1.673-6.105]	7.295 [0.592-13.255]	3.58405	0.166623
HeadFlexExt	Kinematic	Median	13.333 [5.000-18.500]	3.667 [1.667-6.333]	7.333 [0.667-13.667]	3.73577	0.15445
HeadFlexExt	Kinematic	Q05	10.900 [2.750-15.917]	1.667 [0.000-3.333]	5.333 [-1.167-11.500]	2.9394	0.229995
HeadFlexExt	Kinematic	Q95	15.667 [6.750-20.417]	6.000 [3.333-8.000]	9.667 [2.667-15.833]	3.34525	0.187754
HeadFlexExt	Kinematic	Range	4.267 [3.750-4.917]	3.333 [3.333-4.000]	4.333 [3.833-4.433]	3.00074	0.223047
HeadFlexExt	Kinematic	Std	1.659 [1.463-2.085]	1.243 [1.026-1.272]	1.371 [1.288-1.825]	6.33215	0.0421688	0.112009	1	0.100194
HeadLatFlex	Kinematic	IQR	1.333 [1.333-1.917]	1.333 [1.333-1.667]	2.000 [1.667-2.167]	2.99601	0.223576
HeadLatFlex	Kinematic	Mean	1.056 [-3.830-1.863]	0.978 [0.560-1.673]	-0.377 [-2.955-2.753]	0.016292	0.991887
HeadLatFlex	Kinematic	Median	1.167 [-3.667-1.917]	1.000 [0.667-1.667]	-0.333 [-3.000-2.833]	0.063167	0.96891
HeadLatFlex	Kinematic	Q05	-1.167 [-6.167-0.000]	-1.000 [-1.000-0.333]	-2.667 [-5.333-0.067]	0.258745	0.878646
HeadLatFlex	Kinematic	Q95	3.000 [-1.917-4.667]	3.000 [2.000-3.667]	1.667 [-0.833-5.000]	0.275825	0.871175
HeadLatFlex	Kinematic	Range	3.500 [3.333-4.583]	3.667 [3.000-4.333]	4.333 [3.667-5.167]	3.34571	0.18771
HeadLatFlex	Kinematic	Std	1.507 [1.163-1.670]	1.173 [0.959-1.451]	1.502 [1.264-1.957]	4.85408	0.088298
HipLeftAddAbd	Kinematic	IQR	0.667 [0.667-0.917]	0.667 [0.333-0.667]	0.667 [0.667-0.833]	0.433048	0.805313
HipLeftAddAbd	Kinematic	Mean	0.681 [-0.040-2.180]	1.018 [-0.296-2.032]	1.214 [0.964-1.955]	0.61551	0.735095
HipLeftAddAbd	Kinematic	Median	0.833 [0.000-2.250]	1.000 [-0.333-2.000]	1.333 [1.000-2.167]	0.755055	0.685554
HipLeftAddAbd	Kinematic	Q05	0.000 [-0.917-1.167]	-0.333 [-1.000-1.333]	0.667 [-0.167-0.833]	0.394005	0.821189
HipLeftAddAbd	Kinematic	Q95	1.667 [0.750-3.150]	2.667 [0.667-3.000]	2.667 [2.167-3.500]	2.07762	0.353876
HipLeftAddAbd	Kinematic	Range	1.667 [1.417-1.967]	1.667 [1.333-1.667]	1.667 [1.333-2.500]	0.830157	0.660288
HipLeftAddAbd	Kinematic	Std	1.048 [0.566-1.285]	0.491 [0.430-0.979]	0.725 [0.555-1.624]	2.59197	0.273628
HipLeftFlexExt	Kinematic	IQR	0.667 [0.417-0.667]	0.667 [0.667-1.000]	0.667 [0.667-1.000]	1.33047	0.514153
HipLeftFlexExt	Kinematic	Mean	-8.041 [-13.000--4.808]	-6.162 [-8.309--5.883]	-6.204 [-7.167-0.175]	3.76082	0.152527
HipLeftFlexExt	Kinematic	Median	-8.000 [-13.083--4.833]	-6.333 [-8.333--6.000]	-6.333 [-6.833-0.000]	3.82862	0.147443
HipLeftFlexExt	Kinematic	Q05	-8.667 [-13.750--5.583]	-7.000 [-9.333--6.667]	-7.333 [-8.167--0.667]	3.23657	0.198239
HipLeftFlexExt	Kinematic	Q95	-7.167 [-12.250--3.667]	-5.333 [-7.000--5.333]	-5.333 [-5.667-1.167]	3.91161	0.14145
HipLeftFlexExt	Kinematic	Range	1.667 [1.333-2.000]	1.667 [1.333-2.000]	1.667 [1.333-2.500]	0.419764	0.81068
HipLeftFlexExt	Kinematic	Std	0.954 [0.591-1.194]	0.677 [0.424-0.733]	0.683 [0.439-1.038]	1.73547	0.419901
HipRightAddAbd	Kinematic	IQR	0.667 [0.417-0.917]	0.667 [0.333-0.667]	0.667 [0.667-1.000]	1.5278	0.465847
HipRightAddAbd	Kinematic	Mean	0.337 [-1.124-1.501]	-0.081 [-0.487-0.661]	0.897 [-0.572-2.425]	0.977856	0.613283
HipRightAddAbd	Kinematic	Median	0.333 [-1.000-1.583]	0.000 [-0.333-0.667]	1.000 [-0.500-2.500]	1.26708	0.530709
HipRightAddAbd	Kinematic	Q05	-0.667 [-1.917-0.667]	-1.000 [-1.333-0.000]	0.333 [-1.667-1.233]	0.435433	0.804353
HipRightAddAbd	Kinematic	Q95	1.000 [-0.583-2.667]	0.667 [0.000-1.667]	2.000 [0.333-4.500]	1.90808	0.385182
HipRightAddAbd	Kinematic	Range	1.833 [1.383-2.000]	1.667 [1.333-1.667]	2.000 [1.433-2.500]	1.29036	0.524568
HipRightAddAbd	Kinematic	Std	1.038 [0.585-1.325]	0.553 [0.443-0.876]	0.687 [0.520-1.527]	2.78493	0.248462
HipRightFlexExt	Kinematic	IQR	0.667 [0.667-0.917]	0.667 [0.333-0.667]	0.667 [0.333-1.000]	0.250175	0.88242
HipRightFlexExt	Kinematic	Mean	-8.424 [-11.584--2.192]	-7.096 [-8.927--4.982]	-4.224 [-6.192-1.600]	5.12785	0.0770021
HipRightFlexExt	Kinematic	Median	-8.333 [-11.667--2.167]	-7.000 [-9.000--5.000]	-4.333 [-5.833-1.667]	4.92755	0.0851131
HipRightFlexExt	Kinematic	Q05	-9.333 [-12.167--3.167]	-7.533 [-9.667--6.000]	-5.000 [-6.833-0.667]	5.24349	0.0726759
HipRightFlexExt	Kinematic	Q95	-7.167 [-10.917--1.417]	-6.667 [-8.000--3.333]	-3.333 [-5.000-2.333]	4.72391	0.0942357
HipRightFlexExt	Kinematic	Range	1.833 [1.667-2.000]	1.667 [1.333-2.000]	1.333 [1.333-2.167]	0.911774	0.633886
HipRightFlexExt	Kinematic	Std	0.888 [0.572-1.207]	0.541 [0.500-0.849]	0.613 [0.441-1.065]	2.09774	0.350334
KneeLeftFlexExt	Kinematic	IQR	0.500 [0.333-1.250]	1.000 [0.333-1.333]	0.667 [0.333-1.167]	1.18321	0.553439
KneeLeftFlexExt	Kinematic	Mean	1.997 [1.617-6.104]	3.858 [2.339-9.592]	5.154 [3.312-10.754]	3.4183	0.18102
KneeLeftFlexExt	Kinematic	Median	2.000 [1.667-6.250]	4.000 [2.333-9.667]	5.000 [2.833-10.667]	3.00569	0.222497
KneeLeftFlexExt	Kinematic	Q05	1.500 [1.083-4.917]	3.333 [1.667-8.000]	3.667 [2.500-9.667]	3.46153	0.177148
KneeLeftFlexExt	Kinematic	Q95	2.333 [2.000-7.250]	4.333 [3.333-11.000]	6.333 [3.333-12.333]	2.77669	0.249488
KneeLeftFlexExt	Kinematic	Range	1.500 [0.750-2.967]	3.000 [0.333-3.333]	2.000 [0.833-3.167]	0.313643	0.854857
KneeLeftFlexExt	Kinematic	Std	1.115 [0.677-1.387]	1.009 [0.716-1.142]	1.210 [0.429-1.506]	1.34029	0.511634
KneeRightFlexExt	Kinematic	IQR	0.667 [0.333-1.000]	1.000 [0.333-1.667]	0.667 [0.667-1.000]	0.621617	0.732854
KneeRightFlexExt	Kinematic	Mean	4.320 [2.008-10.369]	4.851 [3.056-6.610]	8.458 [2.796-18.461]	1.05877	0.588968
KneeRightFlexExt	Kinematic	Median	4.167 [1.750-10.333]	4.667 [3.000-6.333]	8.333 [2.500-18.333]	0.947114	0.622783
KneeRightFlexExt	Kinematic	Q05	3.167 [1.417-9.250]	3.667 [2.333-4.333]	7.667 [1.833-16.500]	0.877534	0.644831
KneeRightFlexExt	Kinematic	Q95	5.500 [2.500-11.667]	6.000 [3.333-9.667]	9.000 [3.333-20.000]	1.24256	0.537256
KneeRightFlexExt	Kinematic	Range	1.833 [1.000-2.333]	2.333 [0.667-4.667]	2.000 [1.333-3.000]	0.59384	0.743104
KneeRightFlexExt	Kinematic	Std	1.104 [0.620-1.202]	0.918 [0.539-1.639]	0.772 [0.535-1.497]	0.120235	0.941654
MLT	Kinematic	IQR	0.687 [0.482-0.726]	0.497 [0.463-0.530]	0.553 [0.452-0.633]	1.34794	0.50968
MLT	Kinematic	Mean	-0.748 [-1.035--0.577]	-0.233 [-0.709-0.202]	-0.097 [-1.061-0.376]	0.708622	0.701657
MLT	Kinematic	Median	-0.772 [-1.072--0.603]	-0.300 [-0.650-0.313]	-0.067 [-1.005-0.312]	1.02732	0.598302
MLT	Kinematic	Q05	-1.513 [-1.640--1.236]	-1.160 [-1.545--0.499]	-1.032 [-1.699--0.461]	0.698716	0.705141
MLT	Kinematic	Q95	0.036 [-0.470-0.557]	0.333 [-0.373-1.245]	0.720 [-0.073-1.471]	1.4192	0.491841
MLT	Kinematic	Range	1.474 [1.040-1.720]	1.449 [1.130-1.793]	1.340 [0.937-1.989]	0.116012	0.943644
MLT	Kinematic	Std	0.462 [0.349-0.511]	0.416 [0.348-0.455]	0.418 [0.293-0.547]	0.430642	0.806283
ShoulderLeftAddAbd	Kinematic	IQR	0.833 [0.417-1.000]	0.667 [0.667-0.667]	0.667 [0.667-1.167]	1.91192	0.384443
ShoulderLeftAddAbd	Kinematic	Mean	10.048 [7.318-13.260]	11.009 [8.118-12.025]	10.663 [8.978-12.741]	0.507331	0.775951
ShoulderLeftAddAbd	Kinematic	Median	9.833 [7.333-13.417]	11.000 [8.000-12.000]	10.667 [9.000-12.000]	0.380606	0.826709
ShoulderLeftAddAbd	Kinematic	Q05	9.000 [6.500-9.833]	10.000 [7.333-11.333]	9.000 [8.167-11.000]	0.905172	0.635981
ShoulderLeftAddAbd	Kinematic	Q95	10.833 [8.167-15.167]	12.000 [9.000-12.667]	11.667 [9.833-16.167]	0.390515	0.822623
ShoulderLeftAddAbd	Kinematic	Range	1.667 [1.333-2.583]	1.667 [1.333-2.000]	2.333 [1.500-2.767]	2.22347	0.328988
ShoulderLeftAddAbd	Kinematic	Std	1.074 [0.675-1.667]	0.596 [0.458-0.812]	1.292 [0.514-4.787]	3.04022	0.218688
ShoulderLeftFlexExt	Kinematic	IQR	0.667 [0.417-1.000]	0.667 [0.667-1.000]	0.667 [0.667-1.000]	0.0209392	0.989585
ShoulderLeftFlexExt	Kinematic	Mean	-5.100 [-7.037--4.003]	-5.826 [-7.854--3.906]	-3.615 [-5.148--0.950]	2.4715	0.290616
ShoulderLeftFlexExt	Kinematic	Median	-5.000 [-6.917--4.083]	-6.000 [-8.000--4.000]	-4.000 [-5.167--3.000]	1.52071	0.467501
ShoulderLeftFlexExt	Kinematic	Q05	-6.167 [-8.500--5.333]	-6.667 [-8.667--5.333]	-5.667 [-6.000--3.667]	2.15576	0.340316
ShoulderLeftFlexExt	Kinematic	Q95	-4.333 [-5.917--3.083]	-4.667 [-7.000--1.667]	-3.000 [-4.167-1.333]	2.47692	0.28983
ShoulderLeftFlexExt	Kinematic	Range	1.667 [1.417-2.000]	1.667 [1.333-2.000]	2.000 [1.500-2.833]	1.38573	0.50014
ShoulderLeftFlexExt	Kinematic	Std	1.146 [0.575-1.721]	0.609 [0.516-1.106]	1.063 [0.580-3.696]	2.7759	0.249586
ShoulderLeftIntraExtra	Kinematic	IQR	2.000 [1.750-2.833]	1.667 [1.333-1.667]	1.667 [1.667-2.833]	2.26362	0.322448
ShoulderLeftIntraExtra	Kinematic	Mean	9.190 [4.233-12.667]	5.838 [1.215-7.470]	4.897 [-0.901-9.486]	1.68845	0.429891
ShoulderLeftIntraExtra	Kinematic	Median	8.833 [4.833-11.750]	6.000 [1.333-7.667]	4.333 [-1.000-9.667]	1.60799	0.447536
ShoulderLeftIntraExtra	Kinematic	Q05	6.400 [0.450-9.833]	3.333 [-0.333-6.000]	-1.000 [-8.667-4.333]	3.07423	0.215001
ShoulderLeftIntraExtra	Kinematic	Q95	11.667 [7.917-21.150]	7.333 [3.200-9.000]	9.333 [2.167-14.167]	1.14682	0.563602
ShoulderLeftIntraExtra	Kinematic	Range	5.600 [4.417-8.217]	4.000 [3.533-4.333]	4.333 [3.500-10.167]	3.49179	0.174489
ShoulderLeftIntraExtra	Kinematic	Std	1.952 [1.500-3.672]	1.282 [1.053-1.603]	1.332 [1.232-4.587]	3.44504	0.178615
ShoulderRightAddAbd	Kinematic	IQR	0.667 [0.417-0.917]	0.667 [0.667-0.667]	0.667 [0.333-1.333]	0.0503699	0.97513
ShoulderRightAddAbd	Kinematic	Mean	10.494 [9.224-16.010]	11.946 [10.535-15.185]	11.460 [8.804-12.598]	0.407299	0.815748
ShoulderRightAddAbd	Kinematic	Median	10.500 [9.167-16.000]	12.000 [10.667-15.333]	9.667 [8.833-12.000]	0.846269	0.65499
ShoulderRightAddAbd	Kinematic	Q05	9.667 [8.167-11.583]	11.333 [10.000-13.667]	9.000 [8.333-11.500]	1.14592	0.563855
ShoulderRightAddAbd	Kinematic	Q95	12.000 [9.833-17.717]	12.667 [11.333-16.000]	12.200 [9.500-13.333]	0.068144	0.966502
ShoulderRightAddAbd	Kinematic	Range	1.500 [1.333-3.250]	1.333 [1.333-2.000]	1.667 [1.267-2.667]	0.0837239	0.959002
ShoulderRightAddAbd	Kinematic	Std	0.544 [0.437-0.960]	0.455 [0.415-0.672]	0.721 [0.463-1.247]	1.09255	0.579103
ShoulderRightFlexExt	Kinematic	IQR	0.667 [0.667-1.000]	0.667 [0.667-1.000]	0.667 [0.333-1.000]	0.274432	0.871782
ShoulderRightFlexExt	Kinematic	Mean	-4.833 [-6.517--2.965]	-8.632 [-10.309--3.565]	-4.754 [-6.018--2.599]	2.61279	0.270795
ShoulderRightFlexExt	Kinematic	Median	-4.833 [-6.500--2.833]	-8.667 [-10.333--3.333]	-5.000 [-5.833--3.167]	1.94191	0.378721
ShoulderRightFlexExt	Kinematic	Q05	-6.000 [-7.250--4.833]	-9.333 [-11.000--5.000]	-5.667 [-7.167--5.000]	1.69559	0.428358
ShoulderRightFlexExt	Kinematic	Q95	-3.667 [-5.833--2.000]	-7.667 [-9.667--2.667]	-3.333 [-4.500-0.433]	2.88001	0.236926
ShoulderRightFlexExt	Kinematic	Range	1.667 [1.333-2.833]	1.667 [1.667-2.000]	2.000 [1.333-3.000]	0.815313	0.665207
ShoulderRightFlexExt	Kinematic	Std	1.015 [0.603-1.484]	0.572 [0.496-0.999]	1.056 [0.550-3.907]	2.08425	0.352705
ShoulderRightIntraExtra	Kinematic	IQR	2.333 [1.833-3.333]	1.667 [1.667-2.000]	2.667 [1.833-3.500]	4.08307	0.129829
ShoulderRightIntraExtra	Kinematic	Mean	11.839 [10.625-15.434]	6.632 [3.312-7.635]	4.830 [-1.907-7.577]	8.7079	0.0128559	0.198578	0.0130366	1
ShoulderRightIntraExtra	Kinematic	Median	11.333 [9.917-15.917]	6.333 [3.000-7.667]	5.333 [-2.167-7.667]	8.36927	0.0152277	0.164083	0.0179835	1
ShoulderRightIntraExtra	Kinematic	Q05	8.733 [6.867-10.667]	5.000 [1.000-5.667]	-0.533 [-8.767-3.833]	12.6975	0.00174891	0.197151	0.00216545	0.240681
ShoulderRightIntraExtra	Kinematic	Q95	16.833 [13.000-20.767]	9.000 [6.333-10.333]	8.333 [4.167-11.500]	6.35023	0.0417892	0.149829	0.071329	1
ShoulderRightIntraExtra	Kinematic	Range	5.500 [4.317-11.050]	4.667 [4.000-5.000]	5.667 [4.333-9.700]	2.2336	0.327326
ShoulderRightIntraExtra	Kinematic	Std	2.291 [1.434-3.339]	1.529 [1.284-1.864]	1.736 [1.487-4.671]	4.06763	0.130835
Trunk Rotation	Kinematic	IQR	0.667 [0.667-1.167]	0.667 [0.333-0.667]	0.667 [0.500-1.000]	2.33451	0.311221
Trunk Rotation	Kinematic	Mean	-0.567 [-2.358-2.090]	0.779 [-0.548-1.400]	1.137 [0.366-1.453]	1.14618	0.563779
Trunk Rotation	Kinematic	Median	-0.667 [-2.417-2.000]	0.667 [-0.667-1.333]	1.000 [0.333-1.500]	1.22608	0.541701
Trunk Rotation	Kinematic	Q05	-1.667 [-3.083-1.333]	0.333 [-1.000-1.000]	0.000 [-1.000-0.667]	1.33566	0.512821
Trunk Rotation	Kinematic	Q95	0.833 [-1.000-2.833]	1.333 [0.000-2.000]	1.867 [1.333-2.333]	1.04982	0.591609
Trunk Rotation	Kinematic	Range	1.833 [1.417-2.500]	1.333 [1.000-1.333]	1.667 [1.100-2.167]	4.95036	0.0841479
Trunk Rotation	Kinematic	Std	0.530 [0.437-0.716]	0.414 [0.345-0.461]	0.502 [0.388-0.673]	4.00633	0.134907
