# Supplementary material
Source: Research Square preprint supplement (doi:10.21203/rs.3.rs-9449108/v1)
Supplement: Supplementary file 4 [file 8790f465a9a1b30ee60d3b16.xlsx]

## Sheet: Complete_Analysis
Variable	Variable_Type	Metric	Sedentary_Median_IQR	Athletes_Median_IQR	Slackliners_Median_IQR	KW_Statistic	KW_p_value	PostHoc_p_Sed_vs_Ath	PostHoc_p_Sed_vs_Slack	PostHoc_p_Ath_vs_Slack
Cop X	COP	IQR	7.825 [5.450-9.232]	8.528 [7.983-9.717]	8.008 [7.023-10.483]	1.70517	0.426312
Cop X	COP	Mean	0.330 [-5.479-5.399]	5.426 [2.317-8.020]	-1.671 [-10.011-3.466]	4.18311	0.123495
Cop X	COP	Median	0.983 [-4.865-4.729]	0.700 [-3.411-7.633]	-1.250 [-7.933-2.447]	1.95569	0.376122
Cop X	COP	Q05	-8.904 [-12.083--6.095]	-7.325 [-12.730--6.398]	-10.380 [-25.840--8.139]	2.2516	0.324393
Cop X	COP	Q95	7.871 [4.567-15.131]	18.091 [8.443-49.487]	8.224 [-1.813-12.819]	4.21361	0.121626
Cop X	COP	Range	15.521 [14.476-23.080]	24.489 [21.964-56.812]	18.604 [17.342-25.344]	3.78287	0.150855
Cop X	COP	Std	5.157 [4.421-7.284]	11.535 [6.885-17.508]	5.916 [5.485-7.582]	5.79369	0.055197
Cop Y	COP	IQR	21.033 [14.572-28.489]	24.106 [17.278-27.171]	21.028 [13.237-37.354]	0.162255	0.922076
Cop Y	COP	Mean	11.238 [6.217-21.894]	-8.449 [-30.316--6.278]	-0.993 [-13.832-9.207]	9.33074	0.00941577	0.0238905	0.113314	0.385929
Cop Y	COP	Median	11.322 [1.800-19.033]	-8.189 [-29.567--1.278]	-1.758 [-17.728-6.133]	6.58618	0.0371388	0.074234	0.186093	0.96996
Cop Y	COP	Q05	-8.926 [-21.633-8.116]	-62.539 [-71.010--33.803]	-21.885 [-40.311--11.891]	9.50452	0.00863218	0.0145463	0.446583	0.144697
Cop Y	COP	Q95	32.687 [28.086-38.728]	16.720 [2.040-21.268]	18.327 [12.602-45.662]	4.98024	0.0829
Cop Y	COP	Range	45.419 [35.594-52.596]	54.311 [45.752-83.901]	57.444 [31.212-72.220]	2.11334	0.347611
Cop Y	COP	Std	14.736 [10.460-16.724]	17.459 [16.037-25.128]	16.789 [9.373-23.766]	2.92152	0.232059
Cell 1	Cell_Normalized	IQR	0.029 [0.016-0.032]	0.025 [0.021-0.032]	0.026 [0.018-0.030]	0.373724	0.829558
Cell 1	Cell_Normalized	Mean	0.256 [0.239-0.282]	0.234 [0.222-0.243]	0.254 [0.239-0.260]	5.76669	0.0559474
Cell 1	Cell_Normalized	Median	0.252 [0.238-0.280]	0.231 [0.225-0.252]	0.249 [0.237-0.256]	3.2193	0.199957
Cell 1	Cell_Normalized	Q05	0.230 [0.210-0.250]	0.180 [0.172-0.216]	0.230 [0.199-0.238]	6.56832	0.0374721	0.048033	0.825189	0.331836
Cell 1	Cell_Normalized	Q95	0.291 [0.268-0.312]	0.269 [0.256-0.282]	0.280 [0.265-0.309]	4.04469	0.132345
Cell 1	Cell_Normalized	Range	0.052 [0.040-0.069]	0.079 [0.040-0.103]	0.065 [0.042-0.107]	1.12237	0.570532
Cell 1	Cell_Normalized	Std	0.017 [0.013-0.021]	0.024 [0.014-0.033]	0.019 [0.012-0.032]	1.17701	0.555157
Cell 2	Cell_Normalized	IQR	0.023 [0.019-0.031]	0.020 [0.019-0.028]	0.024 [0.018-0.042]	0.296188	0.86235
Cell 2	Cell_Normalized	Mean	0.267 [0.253-0.283]	0.242 [0.226-0.250]	0.246 [0.236-0.261]	6.91178	0.0315593	0.048033	0.158423	1
Cell 2	Cell_Normalized	Median	0.262 [0.248-0.282]	0.243 [0.237-0.252]	0.247 [0.237-0.249]	5.55205	0.0622856
Cell 2	Cell_Normalized	Q05	0.237 [0.225-0.262]	0.216 [0.191-0.225]	0.216 [0.205-0.227]	7.7078	0.0211969	0.0598934	0.0549729	1
Cell 2	Cell_Normalized	Q95	0.299 [0.277-0.310]	0.273 [0.265-0.283]	0.282 [0.261-0.304]	3.2629	0.195646
Cell 2	Cell_Normalized	Range	0.049 [0.044-0.054]	0.054 [0.043-0.061]	0.063 [0.050-0.107]	2.74733	0.253177
Cell 2	Cell_Normalized	Std	0.016 [0.013-0.018]	0.017 [0.013-0.019]	0.019 [0.015-0.033]	2.19311	0.334021
Cell 3	Cell_Normalized	IQR	0.015 [0.013-0.019]	0.020 [0.015-0.028]	0.028 [0.014-0.043]	4.63038	0.0987474
Cell 3	Cell_Normalized	Mean	0.245 [0.232-0.267]	0.267 [0.249-0.285]	0.257 [0.246-0.264]	2.93289	0.230744
Cell 3	Cell_Normalized	Median	0.244 [0.233-0.267]	0.267 [0.251-0.287]	0.255 [0.246-0.265]	3.5759	0.167303
Cell 3	Cell_Normalized	Q05	0.223 [0.219-0.248]	0.240 [0.210-0.248]	0.224 [0.216-0.240]	0.394513	0.82098
Cell 3	Cell_Normalized	Q95	0.264 [0.251-0.288]	0.289 [0.268-0.307]	0.304 [0.284-0.309]	6.99311	0.0303017	0.237538	0.0372754	1
Cell 3	Cell_Normalized	Range	0.035 [0.031-0.042]	0.055 [0.041-0.102]	0.072 [0.041-0.093]	9.4943	0.0086764	0.030337	0.0248226	1
Cell 3	Cell_Normalized	Std	0.011 [0.010-0.013]	0.016 [0.012-0.031]	0.024 [0.013-0.026]	8.04476	0.0179103	0.038289	0.0663111	1
Cell 4	Cell_Normalized	IQR	0.016 [0.012-0.019]	0.028 [0.021-0.034]	0.027 [0.018-0.044]	5.51999	0.0632922
Cell 4	Cell_Normalized	Mean	0.235 [0.231-0.254]	0.268 [0.265-0.287]	0.246 [0.222-0.262]	8.02634	0.018076	0.030337	1	0.0679635
Cell 4	Cell_Normalized	Median	0.235 [0.230-0.249]	0.264 [0.241-0.271]	0.253 [0.232-0.263]	2.8915	0.23557
Cell 4	Cell_Normalized	Q05	0.218 [0.215-0.227]	0.230 [0.217-0.249]	0.204 [0.189-0.232]	4.91764	0.0855358
Cell 4	Cell_Normalized	Q95	0.254 [0.244-0.285]	0.319 [0.292-0.409]	0.285 [0.267-0.309]	9.20727	0.0100154	0.0186991	0.363643	0.172558
Cell 4	Cell_Normalized	Range	0.039 [0.030-0.055]	0.077 [0.060-0.181]	0.065 [0.050-0.098]	9.48648	0.00871039	0.038289	0.0201188	1
Cell 4	Cell_Normalized	Std	0.012 [0.009-0.017]	0.026 [0.020-0.066]	0.019 [0.016-0.030]	12.2536	0.00218361	0.00500801	0.0304873	0.763352
APT	Kinematic	IQR	19.040 [12.496-21.503]	22.248 [20.263-26.407]	21.308 [17.034-25.251]	3.67737	0.159027
APT	Kinematic	Mean	11.981 [9.904-12.732]	18.118 [14.634-20.800]	14.071 [11.287-16.846]	9.53443	0.00850404	0.0112463	0.921679	0.100194
APT	Kinematic	Median	9.438 [7.145-11.424]	18.387 [17.207-22.703]	13.387 [9.217-17.945]	9.85371	0.00724926	0.00864145	0.921679	0.100194
APT	Kinematic	Q05	-1.228 [-2.466--0.486]	0.091 [-0.783-1.552]	-0.330 [-3.348-0.158]	2.04211	0.360214
APT	Kinematic	Q95	24.933 [21.270-33.535]	33.704 [31.261-36.552]	29.783 [24.746-34.556]	4.83713	0.0890492
APT	Kinematic	Range	26.634 [21.499-32.868]	31.815 [29.709-35.148]	29.548 [25.041-37.233]	2.90276	0.234247
APT	Kinematic	Std	9.941 [7.155-11.798]	11.495 [11.034-13.106]	11.415 [9.324-13.054]	2.56441	0.277426
ElbowLeftFlexExt	Kinematic	IQR	9.000 [5.979-12.146]	17.000 [12.333-18.000]	22.333 [12.167-28.958]	5.39623	0.0673322
ElbowLeftFlexExt	Kinematic	Mean	33.151 [20.916-52.018]	32.536 [31.250-35.139]	31.227 [26.115-37.502]	0.439088	0.802885
ElbowLeftFlexExt	Kinematic	Median	31.500 [21.125-51.333]	33.000 [29.833-34.667]	27.000 [22.667-32.250]	1.94705	0.377749
ElbowLeftFlexExt	Kinematic	Q05	17.000 [13.083-24.333]	17.200 [13.933-22.500]	13.667 [10.833-18.217]	1.07056	0.585506
ElbowLeftFlexExt	Kinematic	Q95	50.358 [32.950-86.438]	50.333 [42.000-65.283]	58.000 [45.954-91.333]	1.23924	0.538148
ElbowLeftFlexExt	Kinematic	Range	30.933 [21.304-42.594]	33.667 [23.100-55.067]	47.667 [36.621-67.233]	4.47085	0.106947
ElbowLeftFlexExt	Kinematic	Std	9.573 [6.403-14.423]	11.121 [7.972-17.512]	16.667 [12.921-22.544]	4.35322	0.113425
ElbowRightFlexExt	Kinematic	IQR	9.083 [5.688-13.000]	17.167 [14.500-19.917]	17.833 [15.958-27.917]	8.9822	0.0112083	0.074234	0.0180325	1
ElbowRightFlexExt	Kinematic	Mean	32.215 [25.039-43.170]	28.430 [26.133-36.877]	38.976 [32.550-49.391]	3.31737	0.190389
ElbowRightFlexExt	Kinematic	Median	30.500 [23.250-45.333]	28.167 [24.000-34.750]	41.000 [30.875-46.667]	2.36478	0.306545
ElbowRightFlexExt	Kinematic	Q05	16.192 [12.283-23.000]	15.500 [11.000-16.667]	18.667 [17.267-24.167]	1.95663	0.375944
ElbowRightFlexExt	Kinematic	Q95	44.667 [36.583-62.412]	47.000 [45.667-54.333]	65.450 [51.600-78.892]	4.31332	0.115711
ElbowRightFlexExt	Kinematic	Range	23.533 [20.250-33.492]	35.867 [25.917-45.333]	44.783 [28.742-66.738]	4.17468	0.124016
ElbowRightFlexExt	Kinematic	Std	7.522 [7.092-12.565]	10.891 [9.047-14.807]	14.304 [9.729-22.612]	4.11529	0.127754
HeadFlexExt	Kinematic	IQR	13.833 [9.312-16.000]	9.500 [7.667-21.667]	10.833 [6.167-14.667]	1.1619	0.559366
HeadFlexExt	Kinematic	Mean	-1.175 [-5.368-12.968]	9.379 [-4.507-11.313]	6.540 [-4.115-12.215]	0.090114	0.955943
HeadFlexExt	Kinematic	Median	-0.500 [-6.833-11.917]	11.000 [-3.667-14.333]	5.333 [1.667-14.833]	0.639019	0.726505
HeadFlexExt	Kinematic	Q05	-10.000 [-14.642--0.600]	-7.000 [-16.000--0.567]	-10.217 [-17.667-4.717]	0.00061611	0.999692
HeadFlexExt	Kinematic	Q95	8.667 [6.283-28.000]	21.733 [10.367-23.000]	15.667 [10.242-23.442]	0.288184	0.865808
HeadFlexExt	Kinematic	Range	25.833 [20.358-30.379]	18.667 [17.367-34.750]	27.667 [15.217-34.700]	0.22827	0.892138
HeadFlexExt	Kinematic	Std	8.618 [7.026-9.693]	6.263 [5.689-12.736]	8.079 [5.164-12.029]	0.107318	0.947755
HeadLatFlex	Kinematic	IQR	4.333 [3.583-5.000]	8.667 [7.167-10.417]	6.083 [3.500-8.000]	9.92986	0.00697843	0.00275829	1	0.241023
HeadLatFlex	Kinematic	Mean	2.045 [-0.566-7.051]	6.468 [5.545-7.934]	5.112 [1.766-7.108]	1.51025	0.469952
HeadLatFlex	Kinematic	Median	3.667 [-1.292-6.667]	5.000 [4.000-7.000]	3.667 [1.167-6.500]	0.919095	0.631569
HeadLatFlex	Kinematic	Q05	-2.225 [-5.713-0.358]	-1.667 [-5.675--0.067]	1.000 [-4.600-2.258]	0.57159	0.751417
HeadLatFlex	Kinematic	Q95	9.667 [3.500-14.183]	19.333 [14.000-22.433]	15.000 [9.458-16.675]	6.66453	0.0357121	0.038289	0.388593	0.861942
HeadLatFlex	Kinematic	Range	9.033 [8.492-14.500]	21.600 [15.000-28.833]	18.000 [9.846-20.958]	6.26526	0.0436029	0.0535262	0.390089	0.862486
HeadLatFlex	Kinematic	Std	2.965 [2.681-5.008]	6.963 [4.711-8.667]	5.803 [3.101-6.740]	6.21766	0.0446532	0.048033	0.509118	0.763352
HipLeftAddAbd	Kinematic	IQR	4.062 [3.375-6.000]	10.667 [7.125-12.667]	11.500 [7.833-16.625]	11.7055	0.00287196	0.018631	0.00733814	1
HipLeftAddAbd	Kinematic	Mean	-2.512 [-6.179-0.130]	-3.300 [-7.395-3.736]	-3.032 [-13.887-1.715]	0.374181	0.829369
HipLeftAddAbd	Kinematic	Median	-3.000 [-4.833--0.083]	-2.000 [-3.000-1.667]	-1.333 [-6.083-1.583]	0.479877	0.786676
HipLeftAddAbd	Kinematic	Q05	-8.308 [-14.500--4.300]	-21.333 [-55.600--11.333]	-59.300 [-86.667--9.617]	5.35182	0.0688441
HipLeftAddAbd	Kinematic	Q95	3.667 [1.571-6.517]	17.333 [9.567-43.000]	13.667 [4.000-34.425]	7.96603	0.0186294	0.0145463	0.252243	1
HipLeftAddAbd	Kinematic	Range	11.333 [8.817-19.750]	67.250 [17.583-118.150]	87.333 [28.333-101.600]	11.8306	0.00269779	0.0238905	0.00518036	1
HipLeftAddAbd	Kinematic	Std	3.482 [2.604-5.891]	26.113 [6.308-33.110]	25.886 [8.875-33.371]	13.0292	0.00148164	0.0112463	0.00406578	1
HipLeftFlexExt	Kinematic	IQR	47.833 [42.667-58.312]	67.167 [60.333-87.083]	73.583 [62.000-96.792]	8.2636	0.0160539	0.038289	0.0549729	1
HipLeftFlexExt	Kinematic	Mean	36.922 [31.346-42.279]	57.432 [48.228-73.579]	50.231 [38.952-54.821]	7.28812	0.026146	0.030337	0.446583	0.514381
HipLeftFlexExt	Kinematic	Median	32.167 [22.750-41.333]	62.667 [45.833-71.667]	50.333 [32.917-53.667]	8.38401	0.0151159	0.0112463	0.47667	0.514381
HipLeftFlexExt	Kinematic	Q05	2.500 [-4.500-6.883]	1.700 [-5.567-7.667]	0.100 [-4.367-3.617]	0.320713	0.85184
HipLeftFlexExt	Kinematic	Q95	75.892 [65.833-79.829]	115.933 [93.400-117.500]	96.783 [85.667-123.383]	8.01243	0.0182021	0.038289	0.0663111	1
HipLeftFlexExt	Kinematic	Range	72.842 [64.375-81.092]	115.300 [90.400-121.500]	113.283 [88.450-128.617]	9.7573	0.00760727	0.0145463	0.0372754	1
HipLeftFlexExt	Kinematic	Std	26.002 [21.712-30.865]	36.955 [31.756-45.207]	44.609 [31.458-48.202]	9.1207	0.0104584	0.0238905	0.0453694	1
HipRightAddAbd	Kinematic	IQR	5.333 [4.562-7.167]	16.250 [12.417-25.667]	14.667 [7.833-26.333]	7.46522	0.0239303	0.048033	0.095202	1
HipRightAddAbd	Kinematic	Mean	-0.410 [-2.661-7.712]	5.500 [-2.808-14.164]	13.644 [4.223-17.578]	3.40985	0.181786
HipRightAddAbd	Kinematic	Median	-1.000 [-2.083-6.750]	3.500 [-3.667-4.333]	5.667 [0.167-11.417]	1.99394	0.368995
HipRightAddAbd	Kinematic	Q05	-4.167 [-8.442-0.333]	-2.233 [-50.667--1.333]	-1.450 [-6.458-1.425]	2.8157	0.244669
HipRightAddAbd	Kinematic	Q95	9.308 [2.000-19.875]	46.683 [18.000-120.067]	26.000 [19.167-84.667]	7.95382	0.0187434	0.047894	0.0545198	1
HipRightAddAbd	Kinematic	Range	13.717 [7.533-22.833]	121.125 [20.083-125.667]	40.150 [22.908-88.125]	9.00683	0.0110711	0.0210772	0.0663111	1
HipRightAddAbd	Kinematic	Std	3.991 [2.644-7.235]	32.695 [6.975-43.091]	11.890 [7.561-30.199]	9.6507	0.00802374	0.0238905	0.0304873	1
HipRightFlexExt	Kinematic	IQR	40.500 [34.656-46.375]	63.000 [48.167-68.625]	53.000 [47.958-76.833]	7.68023	0.0214911	0.0238905	0.134278	1
HipRightFlexExt	Kinematic	Mean	57.461 [49.178-60.940]	63.954 [56.975-77.458]	65.039 [52.102-73.758]	2.00261	0.3674
HipRightFlexExt	Kinematic	Median	54.833 [50.042-65.417]	69.000 [61.833-82.250]	67.333 [50.750-73.917]	2.69161	0.26033
HipRightFlexExt	Kinematic	Q05	18.883 [15.000-34.337]	20.733 [13.000-23.850]	24.550 [17.004-30.867]	0.991214	0.609201
HipRightFlexExt	Kinematic	Q95	87.258 [83.362-94.583]	110.467 [93.400-124.100]	101.667 [86.783-118.775]	5.2705	0.0717011
HipRightFlexExt	Kinematic	Range	61.000 [51.392-72.921]	89.733 [79.667-101.100]	69.000 [63.350-108.721]	7.17457	0.0276733	0.0238905	0.217648	1
HipRightFlexExt	Kinematic	Std	21.818 [17.407-27.036]	30.847 [28.782-36.877]	27.498 [24.375-40.711]	7.52022	0.0232812	0.0145463	0.217648	1
KneeLeftFlexExt	Kinematic	IQR	50.250 [39.812-61.333]	56.833 [53.000-81.833]	83.500 [54.708-90.875]	5.04171	0.0803909
KneeLeftFlexExt	Kinematic	Mean	40.547 [39.613-49.332]	56.740 [51.366-73.863]	52.912 [50.008-58.230]	7.90018	0.019253	0.0598934	0.0549729	1
KneeLeftFlexExt	Kinematic	Median	39.333 [34.500-47.417]	58.333 [44.500-78.333]	54.667 [43.917-61.833]	5.99578	0.0498923	0.038289	0.446583	1
KneeLeftFlexExt	Kinematic	Q05	7.525 [2.817-12.425]	14.350 [3.000-21.233]	8.000 [5.500-13.062]	1.09579	0.578166
KneeLeftFlexExt	Kinematic	Q95	72.808 [71.167-88.238]	111.867 [103.083-119.900]	107.667 [89.825-123.742]	7.93078	0.0189606	0.0381714	0.0661815	1
KneeLeftFlexExt	Kinematic	Range	67.733 [63.825-79.717]	99.983 [72.000-111.250]	100.000 [78.512-114.108]	7.02053	0.029889	0.0914585	0.0663111	1
KneeLeftFlexExt	Kinematic	Std	24.370 [22.096-30.300]	32.130 [26.534-40.036]	38.063 [27.934-45.251]	6.50663	0.0386459	0.112009	0.095202	1
KneeRightFlexExt	Kinematic	IQR	11.917 [8.208-16.500]	44.583 [23.333-56.625]	11.083 [6.812-31.917]	9.91669	0.00702453	0.00500801	1	0.074871
KneeRightFlexExt	Kinematic	Mean	16.951 [13.885-22.651]	41.504 [35.759-47.045]	28.716 [11.871-32.337]	5.94837	0.051089
KneeRightFlexExt	Kinematic	Median	14.250 [10.542-19.833]	37.500 [33.000-41.000]	22.000 [8.667-29.167]	4.91384	0.0856986
KneeRightFlexExt	Kinematic	Q05	4.692 [2.417-12.250]	12.333 [7.975-14.333]	7.333 [2.000-8.725]	0.975998	0.613853
KneeRightFlexExt	Kinematic	Q95	38.300 [23.850-55.425]	82.100 [60.567-91.667]	56.217 [22.117-90.000]	5.35397	0.0687703
KneeRightFlexExt	Kinematic	Range	27.842 [17.100-44.329]	64.800 [38.133-80.433]	44.333 [13.942-68.000]	5.04798	0.0801394
KneeRightFlexExt	Kinematic	Std	8.574 [6.167-14.635]	24.707 [13.190-29.231]	12.626 [4.672-24.431]	6.27307	0.0434331	0.0238905	1	0.514381
MLT	Kinematic	IQR	2.886 [2.427-3.692]	5.540 [4.805-7.002]	4.887 [3.494-5.820]	7.24469	0.0267199	0.0598934	0.113314	1
MLT	Kinematic	Mean	-4.797 [-5.387--4.160]	-4.809 [-5.334--3.704]	-5.210 [-8.013--3.125]	0.642111	0.725383
MLT	Kinematic	Median	-4.633 [-5.293--4.377]	-4.810 [-6.123--3.163]	-4.493 [-6.858--3.462]	0.0564642	0.972163
MLT	Kinematic	Q05	-9.435 [-10.869--6.912]	-12.075 [-13.476--10.040]	-10.310 [-14.876--7.963]	1.634	0.441754
MLT	Kinematic	Q95	0.161 [-2.605-1.188]	1.335 [-0.529-2.845]	-1.090 [-3.358-1.278]	2.60716	0.271558
MLT	Kinematic	Range	6.733 [5.779-11.948]	10.648 [9.708-15.925]	9.287 [7.633-11.387]	3.01442	0.221528
MLT	Kinematic	Std	2.207 [1.816-3.214]	3.530 [3.421-5.115]	2.873 [2.471-3.753]	4.66646	0.0969821
ShoulderLeftAddAbd	Kinematic	IQR	28.667 [17.417-30.125]	25.167 [20.833-38.000]	40.000 [23.833-53.208]	3.54169	0.170189
ShoulderLeftAddAbd	Kinematic	Mean	38.199 [33.590-49.432]	25.680 [14.635-38.858]	61.674 [57.177-71.839]	10.5396	0.00514467	0.459126	0.158423	0.00712216
ShoulderLeftAddAbd	Kinematic	Median	38.083 [29.667-51.750]	23.500 [15.000-37.833]	62.333 [52.833-76.000]	8.97574	0.0112446	0.36148	0.253454	0.0186526
ShoulderLeftAddAbd	Kinematic	Q05	11.500 [2.331-14.750]	0.000 [0.000-13.333]	19.367 [0.000-31.983]	3.60097	0.165218
ShoulderLeftAddAbd	Kinematic	Q95	77.667 [52.667-88.612]	67.367 [37.417-76.667]	98.000 [86.650-117.775]	10.4142	0.00547755	0.709334	0.0549729	0.0148151
ShoulderLeftAddAbd	Kinematic	Range	53.167 [35.162-64.917]	54.033 [30.000-72.933]	68.133 [54.967-104.442]	4.95824	0.0838169
ShoulderLeftAddAbd	Kinematic	Std	17.494 [11.202-20.546]	16.484 [11.940-25.407]	24.739 [18.821-38.567]	5.11221	0.0776066
ShoulderLeftFlexExt	Kinematic	IQR	41.583 [23.333-64.625]	66.667 [55.167-67.667]	71.333 [52.583-88.458]	5.11162	0.0776293
ShoulderLeftFlexExt	Kinematic	Mean	26.105 [11.757-38.211]	42.680 [35.308-62.636]	43.178 [37.250-60.945]	6.18669	0.0453499	0.198578	0.0663111	1
ShoulderLeftFlexExt	Kinematic	Median	24.333 [7.750-37.500]	50.000 [39.333-67.667]	36.333 [13.750-69.917]	4.54071	0.103275
ShoulderLeftFlexExt	Kinematic	Q05	-8.500 [-10.667--3.917]	-5.000 [-6.083--2.000]	0.000 [-2.817-0.000]	5.81794	0.0545319
ShoulderLeftFlexExt	Kinematic	Q95	79.000 [40.775-92.250]	99.500 [84.833-105.500]	116.667 [93.150-133.550]	7.41289	0.0245647	0.237538	0.0549729	0.446638
ShoulderLeftFlexExt	Kinematic	Range	69.000 [45.192-107.342]	105.167 [89.833-112.000]	102.150 [87.292-140.500]	4.27746	0.117804
ShoulderLeftFlexExt	Kinematic	Std	24.209 [15.053-34.965]	36.241 [34.389-40.477]	40.255 [31.830-47.567]	7.51449	0.023348	0.112009	0.0453694	1
ShoulderLeftIntraExtra	Kinematic	IQR	30.542 [13.833-41.979]	18.833 [11.000-25.667]	18.333 [11.417-32.625]	0.739381	0.690948
ShoulderLeftIntraExtra	Kinematic	Mean	23.941 [-1.569-40.761]	-2.458 [-6.728-14.887]	24.707 [19.979-36.316]	3.95601	0.138345
ShoulderLeftIntraExtra	Kinematic	Median	22.167 [-13.333-46.875]	-0.333 [-8.333-14.167]	23.667 [14.833-35.500]	2.9804	0.225328
ShoulderLeftIntraExtra	Kinematic	Q05	-7.650 [-47.500-8.500]	-21.033 [-44.525--13.733]	6.675 [-14.967-13.350]	2.05572	0.357772
ShoulderLeftIntraExtra	Kinematic	Q95	61.808 [49.467-82.463]	26.067 [22.000-60.700]	49.000 [38.600-62.200]	3.00859	0.222174
ShoulderLeftIntraExtra	Kinematic	Range	63.233 [47.087-72.992]	47.100 [36.433-86.133]	51.592 [33.442-57.142]	1.07952	0.582889
ShoulderLeftIntraExtra	Kinematic	Std	20.959 [15.418-25.202]	15.305 [10.648-25.279]	17.968 [10.589-20.983]	1.37887	0.501859
ShoulderRightAddAbd	Kinematic	IQR	20.917 [10.688-22.792]	19.333 [13.000-26.917]	37.708 [29.167-56.542]	7.7478	0.0207772	1	0.0663111	0.0555404
ShoulderRightAddAbd	Kinematic	Mean	35.223 [29.027-44.533]	14.555 [7.367-26.385]	43.022 [37.772-56.757]	11.1233	0.00384246	0.048033	0.825189	0.00712216
ShoulderRightAddAbd	Kinematic	Median	35.667 [28.250-40.833]	8.750 [0.000-26.667]	44.667 [33.167-56.500]	13.8996	0.000958815	0.0125488	0.577567	0.00319206
ShoulderRightAddAbd	Kinematic	Q05	13.000 [5.750-17.558]	0.000 [0.000-11.333]	0.000 [0.000-6.983]	6.37293	0.0413176	0.158668	0.0742965	1
ShoulderRightAddAbd	Kinematic	Q95	57.450 [42.533-71.917]	44.267 [19.333-52.700]	92.333 [67.842-103.108]	9.06147	0.0107728	0.459126	0.253454	0.0148151
ShoulderRightAddAbd	Kinematic	Range	34.433 [24.400-54.258]	33.000 [19.333-44.267]	83.200 [62.842-94.292]	10.6334	0.00490885	1	0.095202	0.0055198
ShoulderRightAddAbd	Kinematic	Std	12.626 [7.848-17.741]	10.978 [7.581-23.191]	26.761 [18.600-32.085]	6.90681	0.0316377	1	0.134278	0.0555404
ShoulderRightFlexExt	Kinematic	IQR	39.792 [17.292-61.792]	65.333 [54.667-81.833]	79.417 [62.062-93.000]	7.594	0.0224379	0.136366	0.0453694	0.96996
ShoulderRightFlexExt	Kinematic	Mean	22.242 [6.486-37.827]	47.017 [33.306-65.851]	47.850 [33.747-61.451]	7.68199	0.0214722	0.048033	0.0663111	1
ShoulderRightFlexExt	Kinematic	Median	15.500 [1.583-32.083]	44.667 [37.333-82.000]	44.000 [7.833-71.500]	6.3491	0.041813	0.0381714	0.388593	1
ShoulderRightFlexExt	Kinematic	Q05	-5.975 [-13.583--3.933]	-7.025 [-11.000--2.383]	-4.817 [-6.750-0.000]	1.3466	0.510023
ShoulderRightFlexExt	Kinematic	Q95	72.042 [20.642-101.200]	99.433 [92.333-106.333]	115.550 [101.817-130.750]	9.21849	0.00995934	0.306959	0.0304873	0.120716
ShoulderRightFlexExt	Kinematic	Range	62.692 [26.808-111.442]	103.333 [98.500-115.025]	115.550 [108.400-138.725]	7.67742	0.0215214	0.617002	0.0549729	0.144697
ShoulderRightFlexExt	Kinematic	Std	23.301 [10.152-39.706]	37.038 [35.895-40.382]	44.452 [41.528-46.957]	9.47307	0.008769	0.617002	0.0304873	0.0555404
ShoulderRightIntraExtra	Kinematic	IQR	31.542 [16.604-42.542]	17.750 [11.500-26.333]	19.792 [14.500-46.250]	1.62122	0.444587
ShoulderRightIntraExtra	Kinematic	Mean	35.162 [10.071-50.833]	1.750 [-3.539-17.351]	14.653 [1.902-21.855]	3.25642	0.19628
ShoulderRightIntraExtra	Kinematic	Median	35.833 [-4.083-49.500]	0.667 [-6.000-15.000]	19.333 [6.500-23.917]	3.49594	0.174127
ShoulderRightIntraExtra	Kinematic	Q05	6.733 [-28.333-22.192]	-8.000 [-29.525--2.467]	-17.950 [-47.908--6.283]	2.80683	0.245756
ShoulderRightIntraExtra	Kinematic	Q95	68.725 [50.333-85.233]	26.000 [12.000-55.000]	43.333 [32.200-52.833]	5.27924	0.0713882
ShoulderRightIntraExtra	Kinematic	Range	63.133 [52.746-66.054]	49.800 [29.083-52.933]	61.667 [43.217-72.150]	3.06896	0.215568
ShoulderRightIntraExtra	Kinematic	Std	19.914 [17.685-22.965]	17.118 [9.046-18.789]	22.709 [13.015-25.796]	2.58118	0.275108
Trunk Rotation	Kinematic	IQR	5.000 [2.500-6.729]	8.667 [4.333-9.000]	7.667 [4.542-9.333]	2.65798	0.264745
Trunk Rotation	Kinematic	Mean	0.901 [-1.282-2.679]	-3.436 [-4.405--0.583]	-0.386 [-2.410-1.306]	5.94827	0.0510916
Trunk Rotation	Kinematic	Median	0.833 [-1.667-2.375]	-2.750 [-5.000--1.000]	0.000 [-1.750-1.333]	7.35561	0.0252784	0.0595678	1	0.0745442
Trunk Rotation	Kinematic	Q05	-4.667 [-6.654--2.250]	-11.667 [-13.000--6.233]	-8.467 [-10.167--3.833]	7.4987	0.023533	0.0238905	0.252243	1
Trunk Rotation	Kinematic	Q95	7.117 [4.375-11.867]	4.025 [3.117-5.000]	5.500 [2.742-9.000]	1.18595	0.552681
Trunk Rotation	Kinematic	Range	10.417 [6.083-16.421]	15.600 [11.233-17.025]	14.683 [11.500-17.229]	1.94029	0.379027
Trunk Rotation	Kinematic	Std	3.325 [1.915-4.723]	4.490 [3.478-5.531]	4.822 [3.719-5.413]	3.25355	0.196562
