# Supplementary material
Source: Research Square preprint supplement (doi:10.21203/rs.3.rs-9449108/v1)
Supplement: Supplementary file 5 [file bca806bf5027d857c8dda99e.xlsx]

## Sheet: Complete_Analysis
Variable	Variable_Type	Metric	Sedentary_Median_IQR	Athletes_Median_IQR	Slackliners_Median_IQR	KW_Statistic	KW_p_value	PostHoc_p_Sed_vs_Ath	PostHoc_p_Sed_vs_Slack	PostHoc_p_Ath_vs_Slack
Cop X	COP	IQR	14.950 [13.050-19.850]	13.300 [11.267-15.033]	16.600 [14.317-18.133]	4.33889	0.114241
Cop X	COP	Mean	2.519 [0.594-6.407]	1.289 [-0.144-4.448]	4.117 [-4.169-8.060]	0.124093	0.939839
Cop X	COP	Median	2.450 [-1.050-8.450]	2.533 [-0.667-4.400]	0.000 [-3.267-7.733]	0.0838283	0.958952
Cop X	COP	Q05	-20.480 [-23.975--15.770]	-15.400 [-19.293--13.873]	-18.467 [-22.670--9.510]	1.02393	0.599317
Cop X	COP	Q95	23.650 [19.085-30.135]	17.100 [14.347-23.787]	23.160 [16.057-26.443]	1.2453	0.53652
Cop X	COP	Range	39.953 [31.853-46.788]	32.500 [29.460-44.607]	37.207 [32.930-44.810]	2.17844	0.336478
Cop X	COP	Std	11.767 [9.834-15.624]	9.585 [8.805-12.951]	11.035 [10.479-13.334]	2.72898	0.255511
Cop Y	COP	IQR	25.583 [19.775-28.000]	25.433 [18.100-40.300]	24.933 [16.600-35.450]	0.215432	0.897883
Cop Y	COP	Mean	-48.163 [-77.894--40.128]	-52.289 [-72.726--37.016]	-44.013 [-65.787--37.502]	0.28739	0.866152
Cop Y	COP	Median	-49.650 [-77.675--42.367]	-48.267 [-74.033--36.700]	-53.767 [-68.050--36.350]	0.378873	0.827425
Cop Y	COP	Q05	-71.940 [-97.790--66.220]	-83.160 [-94.340--57.500]	-83.053 [-94.190--57.163]	0.286033	0.86674
Cop Y	COP	Q95	-19.540 [-31.995--10.055]	-23.680 [-50.400--13.427]	-13.400 [-31.930-9.220]	0.851209	0.653375
Cop Y	COP	Range	59.040 [45.808-68.865]	63.273 [43.047-70.660]	52.220 [42.343-75.323]	0.151202	0.927186
Cop Y	COP	Std	18.209 [14.210-22.607]	20.359 [12.720-22.670]	16.438 [13.148-23.687]	0.311619	0.855722
Cell 1	Cell_Normalized	IQR	0.022 [0.021-0.028]	0.019 [0.017-0.029]	0.021 [0.017-0.032]	0.55463	0.757816
Cell 1	Cell_Normalized	Mean	0.206 [0.184-0.229]	0.209 [0.184-0.221]	0.205 [0.194-0.220]	0.0432845	0.97859
Cell 1	Cell_Normalized	Median	0.205 [0.180-0.230]	0.212 [0.187-0.221]	0.208 [0.199-0.213]	0.0678711	0.966634
Cell 1	Cell_Normalized	Q05	0.181 [0.161-0.203]	0.181 [0.160-0.198]	0.178 [0.160-0.190]	0.173724	0.916803
Cell 1	Cell_Normalized	Q95	0.233 [0.223-0.261]	0.238 [0.217-0.253]	0.229 [0.219-0.274]	0.0426067	0.978922
Cell 1	Cell_Normalized	Range	0.058 [0.053-0.065]	0.055 [0.047-0.083]	0.060 [0.046-0.075]	0.30376	0.859091
Cell 1	Cell_Normalized	Std	0.019 [0.016-0.021]	0.018 [0.014-0.024]	0.017 [0.013-0.023]	0.443467	0.801129
Cell 2	Cell_Normalized	IQR	0.024 [0.022-0.027]	0.022 [0.017-0.034]	0.024 [0.018-0.035]	0.23566	0.888847
Cell 2	Cell_Normalized	Mean	0.214 [0.198-0.222]	0.206 [0.191-0.224]	0.208 [0.194-0.226]	0.0319322	0.984161
Cell 2	Cell_Normalized	Median	0.211 [0.196-0.220]	0.209 [0.188-0.221]	0.209 [0.190-0.225]	0.017156	0.991459
Cell 2	Cell_Normalized	Q05	0.184 [0.174-0.192]	0.176 [0.167-0.204]	0.176 [0.163-0.205]	0.0144151	0.992818
Cell 2	Cell_Normalized	Q95	0.246 [0.237-0.258]	0.238 [0.213-0.265]	0.246 [0.231-0.271]	0.879518	0.644192
Cell 2	Cell_Normalized	Range	0.056 [0.054-0.076]	0.048 [0.038-0.070]	0.066 [0.041-0.071]	1.15713	0.560702
Cell 2	Cell_Normalized	Std	0.017 [0.017-0.024]	0.015 [0.012-0.023]	0.020 [0.013-0.022]	1.15713	0.560702
Cell 3	Cell_Normalized	IQR	0.027 [0.025-0.034]	0.027 [0.018-0.035]	0.027 [0.021-0.036]	0.45422	0.796833
Cell 3	Cell_Normalized	Mean	0.309 [0.275-0.313]	0.294 [0.285-0.303]	0.292 [0.274-0.307]	0.945833	0.623182
Cell 3	Cell_Normalized	Median	0.311 [0.281-0.320]	0.290 [0.285-0.302]	0.285 [0.273-0.311]	1.56352	0.4576
Cell 3	Cell_Normalized	Q05	0.264 [0.238-0.282]	0.268 [0.258-0.280]	0.252 [0.236-0.260]	1.15062	0.562532
Cell 3	Cell_Normalized	Q95	0.336 [0.305-0.347]	0.325 [0.317-0.335]	0.335 [0.299-0.345]	0.44984	0.79858
Cell 3	Cell_Normalized	Range	0.058 [0.055-0.078]	0.053 [0.045-0.073]	0.063 [0.048-0.084]	1.35062	0.509
Cell 3	Cell_Normalized	Std	0.018 [0.017-0.025]	0.017 [0.014-0.022]	0.020 [0.014-0.026]	1.08734	0.580614
Cell 4	Cell_Normalized	IQR	0.026 [0.019-0.028]	0.021 [0.019-0.034]	0.026 [0.024-0.030]	0.959648	0.618892
Cell 4	Cell_Normalized	Mean	0.303 [0.277-0.328]	0.297 [0.293-0.310]	0.296 [0.282-0.302]	0.944164	0.623702
Cell 4	Cell_Normalized	Median	0.298 [0.279-0.328]	0.299 [0.295-0.308]	0.295 [0.282-0.302]	1.13457	0.567062
Cell 4	Cell_Normalized	Q05	0.264 [0.245-0.294]	0.264 [0.263-0.271]	0.267 [0.243-0.270]	0.378873	0.827425
Cell 4	Cell_Normalized	Q95	0.336 [0.305-0.364]	0.335 [0.315-0.342]	0.326 [0.315-0.338]	0.101935	0.950309
Cell 4	Cell_Normalized	Range	0.062 [0.052-0.078]	0.071 [0.054-0.081]	0.064 [0.059-0.076]	0.172421	0.917401
Cell 4	Cell_Normalized	Std	0.019 [0.016-0.022]	0.021 [0.016-0.024]	0.019 [0.019-0.023]	0.24984	0.882567
APT	Kinematic	IQR	22.170 [16.547-31.567]	12.840 [11.210-28.700]	18.010 [14.115-26.530]	1.26939	0.530097
APT	Kinematic	Mean	12.222 [5.384-14.776]	9.355 [6.021-16.882]	12.782 [10.239-15.186]	0.407299	0.815748
APT	Kinematic	Median	12.000 [3.607-17.442]	8.340 [6.200-18.890]	10.440 [9.005-15.055]	0.255275	0.880172
APT	Kinematic	Q05	-3.413 [-4.152--1.683]	-0.830 [-1.400-1.600]	-0.940 [-2.020-0.588]	10.1013	0.00640501	0.0238905	0.0201188	1
APT	Kinematic	Q95	30.030 [21.879-35.393]	20.160 [17.964-37.900]	27.566 [23.528-33.992]	1.33361	0.513347
APT	Kinematic	Range	32.698 [26.407-39.755]	21.626 [16.780-35.720]	28.172 [23.358-34.474]	1.95913	0.375475
APT	Kinematic	Std	11.513 [9.304-14.872]	7.310 [5.851-13.444]	9.827 [8.008-13.233]	1.75737	0.415329
ElbowLeftFlexExt	Kinematic	IQR	14.500 [11.250-23.000]	9.000 [7.000-10.000]	11.000 [8.000-20.000]	4.25787	0.118964
ElbowLeftFlexExt	Kinematic	Mean	27.025 [21.644-33.497]	33.537 [21.063-35.850]	32.924 [24.222-47.503]	0.657947	0.719662
ElbowLeftFlexExt	Kinematic	Median	28.000 [20.250-32.500]	36.000 [20.000-37.000]	33.000 [23.000-48.500]	0.64357	0.724854
ElbowLeftFlexExt	Kinematic	Q05	8.200 [3.250-19.000]	15.000 [10.000-19.000]	18.000 [10.400-22.000]	1.6328	0.442021
ElbowLeftFlexExt	Kinematic	Q95	45.300 [35.250-58.000]	46.000 [33.000-48.000]	56.000 [33.500-68.000]	0.265279	0.875781
ElbowLeftFlexExt	Kinematic	Range	34.800 [24.750-53.400]	25.000 [24.000-32.000]	23.000 [19.800-49.500]	1.038	0.595116
ElbowLeftFlexExt	Kinematic	Std	11.370 [9.209-16.886]	8.359 [7.634-9.411]	8.728 [6.086-14.726]	2.24785	0.325002
ElbowRightFlexExt	Kinematic	IQR	15.000 [8.500-29.000]	16.000 [11.000-17.000]	19.000 [9.500-33.500]	0.091372	0.955342
ElbowRightFlexExt	Kinematic	Mean	21.842 [18.472-30.386]	30.574 [26.741-32.331]	39.180 [32.639-44.452]	2.8915	0.23557
ElbowRightFlexExt	Kinematic	Median	22.500 [16.500-31.500]	33.000 [24.000-36.000]	39.000 [34.500-43.500]	4.01639	0.134231
ElbowRightFlexExt	Kinematic	Q05	8.000 [4.250-12.300]	14.000 [6.000-18.000]	19.000 [10.500-22.000]	3.25074	0.196839
ElbowRightFlexExt	Kinematic	Q95	35.500 [28.250-61.450]	45.000 [37.600-45.000]	62.000 [42.300-85.000]	1.98644	0.370382
ElbowRightFlexExt	Kinematic	Range	26.000 [16.700-53.450]	27.000 [26.000-32.000]	40.000 [25.500-67.000]	0.967176	0.616567
ElbowRightFlexExt	Kinematic	Std	9.293 [6.345-18.910]	9.597 [9.049-16.552]	12.605 [8.383-20.346]	0.441395	0.801959
HeadFlexExt	Kinematic	IQR	21.000 [8.000-28.500]	13.000 [7.000-17.000]	13.000 [10.000-15.500]	1.6134	0.446328
HeadFlexExt	Kinematic	Mean	-3.290 [-7.956-0.767]	-11.722 [-13.426--4.573]	-8.989 [-14.998-1.218]	2.6254	0.269092
HeadFlexExt	Kinematic	Median	-5.000 [-7.500--0.500]	-10.000 [-14.000--4.000]	-5.000 [-13.000-2.000]	1.65513	0.437113
HeadFlexExt	Kinematic	Q05	-16.000 [-27.750--6.250]	-22.000 [-31.000--15.000]	-26.000 [-32.300--13.800]	2.11386	0.347521
HeadFlexExt	Kinematic	Q95	10.000 [7.250-19.750]	1.000 [-5.000-7.000]	8.000 [-3.000-13.000]	7.05464	0.0293836	0.023236	0.610041	0.623809
HeadFlexExt	Kinematic	Range	37.000 [19.250-41.750]	22.000 [16.000-29.000]	28.000 [23.300-33.500]	2.39251	0.302324
HeadFlexExt	Kinematic	Std	12.666 [6.868-14.240]	8.579 [5.508-9.239]	9.168 [7.124-10.605]	3.0176	0.221176
HeadLatFlex	Kinematic	IQR	9.000 [7.250-11.500]	7.000 [6.000-11.000]	7.000 [6.000-15.000]	0.656172	0.720301
HeadLatFlex	Kinematic	Mean	-2.658 [-4.299-0.125]	-0.822 [-2.879-0.678]	0.258 [-3.573-1.746]	0.644718	0.724438
HeadLatFlex	Kinematic	Median	-2.500 [-3.750--0.250]	-1.000 [-3.000-2.000]	0.000 [-3.000-2.000]	1.19964	0.54891
HeadLatFlex	Kinematic	Q05	-15.000 [-18.250--9.250]	-14.000 [-15.000--8.000]	-14.000 [-15.000--8.500]	0.553672	0.758179
HeadLatFlex	Kinematic	Q95	6.500 [4.000-10.450]	10.000 [7.000-12.000]	11.000 [8.000-14.500]	0.711534	0.700636
HeadLatFlex	Kinematic	Range	23.800 [16.250-25.750]	17.000 [16.000-31.000]	18.000 [16.000-29.500]	0.035036	0.982635
HeadLatFlex	Kinematic	Std	7.507 [5.048-8.296]	5.607 [4.822-9.189]	5.490 [4.865-9.569]	0.101935	0.950309
HipLeftAddAbd	Kinematic	IQR	35.000 [34.000-41.500]	32.000 [26.000-38.000]	45.000 [38.000-58.000]	5.22918	0.0731979
HipLeftAddAbd	Kinematic	Mean	-9.859 [-13.289--8.903]	-10.084 [-11.314--7.931]	-14.422 [-14.774--10.515]	3.83225	0.147177
HipLeftAddAbd	Kinematic	Median	-4.500 [-6.500--3.250]	-4.000 [-5.000--3.000]	-5.000 [-7.000--3.500]	1.32932	0.514447
HipLeftAddAbd	Kinematic	Q05	-60.300 [-68.750--50.400]	-48.000 [-51.000--41.000]	-65.000 [-80.500--51.000]	5.65973	0.0590209
HipLeftAddAbd	Kinematic	Q95	51.000 [27.250-54.450]	34.000 [30.600-46.000]	61.000 [38.000-73.000]	3.93541	0.139777
HipLeftAddAbd	Kinematic	Range	110.000 [80.400-122.450]	81.600 [68.600-94.000]	123.000 [86.000-151.000]	4.43241	0.109022
HipLeftAddAbd	Kinematic	Std	32.650 [26.152-35.218]	24.211 [20.457-28.946]	35.023 [26.876-48.011]	5.47214	0.0648246
HipLeftFlexExt	Kinematic	IQR	42.000 [36.250-49.000]	26.000 [17.000-61.000]	42.000 [26.000-54.000]	0.651137	0.722117
HipLeftFlexExt	Kinematic	Mean	34.561 [24.929-41.650]	23.710 [17.971-39.146]	38.542 [27.291-41.840]	1.28304	0.526492
HipLeftFlexExt	Kinematic	Median	34.000 [17.250-44.250]	22.000 [15.000-46.000]	34.000 [27.000-44.500]	1.06747	0.58641
HipLeftFlexExt	Kinematic	Q05	3.000 [0.350-9.500]	5.000 [4.000-11.000]	11.000 [2.000-15.500]	2.1415	0.342751
HipLeftFlexExt	Kinematic	Q95	65.000 [58.500-77.500]	44.000 [39.000-78.000]	72.000 [49.500-76.300]	1.56558	0.457128
HipLeftFlexExt	Kinematic	Range	61.500 [52.250-73.250]	38.000 [33.000-73.000]	53.000 [45.000-72.800]	2.05243	0.358362
HipLeftFlexExt	Kinematic	Std	23.412 [18.740-26.222]	13.588 [10.593-30.668]	19.841 [15.352-27.422]	1.70376	0.426612
HipRightAddAbd	Kinematic	IQR	36.000 [31.250-45.000]	31.000 [25.000-37.000]	46.000 [38.000-69.500]	4.5768	0.101428
HipRightAddAbd	Kinematic	Mean	5.383 [0.621-7.316]	2.977 [1.630-3.314]	7.103 [5.228-16.257]	5.95178	0.0510021
HipRightAddAbd	Kinematic	Median	-3.000 [-4.000--2.250]	-3.000 [-6.000--2.000]	-2.000 [-5.000-0.500]	0.883621	0.642871
HipRightAddAbd	Kinematic	Q05	-46.100 [-49.900--33.500]	-40.000 [-47.000--38.000]	-55.000 [-60.000--42.000]	3.38242	0.184296
HipRightAddAbd	Kinematic	Q95	61.100 [39.400-67.500]	39.000 [37.000-49.000]	68.400 [48.500-89.000]	5.39023	0.0675348
HipRightAddAbd	Kinematic	Range	106.600 [75.900-117.100]	87.000 [72.600-90.000]	123.400 [87.800-148.500]	4.3673	0.11263
HipRightAddAbd	Kinematic	Std	32.414 [24.149-36.751]	24.828 [21.027-26.417]	35.241 [27.146-49.380]	5.38579	0.0676846
HipRightFlexExt	Kinematic	IQR	48.000 [40.000-54.500]	32.000 [30.000-69.000]	39.000 [28.000-63.000]	0.600548	0.740615
HipRightFlexExt	Kinematic	Mean	25.189 [13.983-29.300]	15.641 [13.283-28.154]	29.579 [24.212-35.381]	1.92257	0.382402
HipRightFlexExt	Kinematic	Median	26.000 [11.000-32.500]	14.000 [13.000-30.000]	31.000 [17.500-36.000]	1.02798	0.598106
HipRightFlexExt	Kinematic	Q05	-7.000 [-12.250--2.250]	-6.000 [-12.000--4.000]	2.400 [-10.000-6.500]	3.13789	0.208264
HipRightFlexExt	Kinematic	Q95	59.500 [54.500-66.450]	46.000 [40.600-80.000]	66.000 [56.000-73.500]	1.08241	0.582048
HipRightFlexExt	Kinematic	Range	66.300 [59.250-78.000]	49.000 [46.600-80.000]	63.000 [42.500-77.300]	0.56934	0.752263
HipRightFlexExt	Kinematic	Std	23.565 [23.137-28.446]	17.299 [15.825-30.747]	21.375 [15.354-29.976]	0.991932	0.608982
KneeLeftFlexExt	Kinematic	IQR	21.000 [12.750-23.500]	8.000 [6.000-33.000]	23.000 [18.500-39.000]	2.75825	0.251799
KneeLeftFlexExt	Kinematic	Mean	23.085 [18.742-24.956]	17.756 [9.561-30.682]	31.797 [20.415-38.256]	3.53619	0.170658
KneeLeftFlexExt	Kinematic	Median	19.500 [10.250-22.500]	13.000 [5.000-31.000]	27.000 [17.000-36.500]	2.47481	0.290137
KneeLeftFlexExt	Kinematic	Q05	2.000 [2.000-8.750]	2.000 [2.000-5.000]	7.000 [2.500-14.500]	2.57397	0.276102
KneeLeftFlexExt	Kinematic	Q95	56.500 [51.500-63.750]	51.000 [32.000-65.600]	61.000 [54.500-72.500]	2.56652	0.277133
KneeLeftFlexExt	Kinematic	Range	51.500 [43.250-58.000]	42.000 [30.000-58.000]	53.000 [46.000-62.000]	1.58164	0.453473
KneeLeftFlexExt	Kinematic	Std	16.242 [13.908-18.863]	12.741 [9.910-19.788]	18.768 [13.842-20.744]	1.71507	0.424206
KneeRightFlexExt	Kinematic	IQR	35.000 [18.750-40.750]	31.000 [18.000-49.000]	27.000 [20.000-49.500]	0.148177	0.928589
KneeRightFlexExt	Kinematic	Mean	29.509 [20.753-36.191]	28.449 [25.730-35.148]	31.358 [26.836-45.966]	1.31099	0.519184
KneeRightFlexExt	Kinematic	Median	27.500 [16.750-32.750]	25.000 [22.000-32.000]	27.000 [22.000-43.000]	0.971292	0.6153
KneeRightFlexExt	Kinematic	Q05	4.500 [1.000-14.250]	5.000 [1.000-8.000]	12.000 [2.000-13.000]	1.64252	0.439877
KneeRightFlexExt	Kinematic	Q95	61.000 [40.250-68.850]	64.000 [55.000-76.600]	67.000 [60.000-79.000]	1.71363	0.424511
KneeRightFlexExt	Kinematic	Range	49.300 [33.500-64.750]	50.000 [47.000-63.000]	51.000 [41.000-66.500]	0.44888	0.798963
KneeRightFlexExt	Kinematic	Std	18.165 [12.986-23.413]	16.777 [13.563-22.600]	16.538 [13.436-24.400]	0.11566	0.94381
MLT	Kinematic	IQR	28.940 [26.468-35.750]	25.880 [21.180-31.040]	33.740 [29.365-42.355]	3.26841	0.195107
MLT	Kinematic	Mean	6.870 [4.852-7.807]	4.819 [4.002-5.839]	7.507 [5.513-10.450]	3.86217	0.144991
MLT	Kinematic	Median	0.655 [-0.110-1.325]	0.000 [-0.310-1.170]	1.300 [0.210-2.315]	3.85656	0.145398
MLT	Kinematic	Q05	-36.401 [-41.759--21.242]	-28.036 [-32.188--25.030]	-38.730 [-42.495--33.708]	3.75613	0.152886
MLT	Kinematic	Q95	47.593 [34.982-51.610]	33.480 [32.668-37.274]	43.568 [36.315-58.548]	4.06264	0.131162
MLT	Kinematic	Range	81.557 [55.321-93.919]	61.516 [58.866-69.462]	83.040 [68.864-101.043]	4.06419	0.131061
MLT	Kinematic	Std	24.958 [18.384-27.930]	17.647 [17.347-20.999]	24.936 [21.061-31.387]	4.27378	0.118021
ShoulderLeftAddAbd	Kinematic	IQR	32.500 [20.000-47.250]	18.000 [17.000-26.000]	22.000 [16.500-26.500]	2.47682	0.289844
ShoulderLeftAddAbd	Kinematic	Mean	58.217 [38.787-72.389]	48.501 [34.113-76.672]	87.360 [76.620-109.518]	12.3121	0.00212057	1	0.00829402	0.011668
ShoulderLeftAddAbd	Kinematic	Median	58.500 [30.250-73.500]	38.000 [24.000-69.000]	90.000 [74.000-109.000]	12.1737	0.00227259	1	0.0130366	0.00914044
ShoulderLeftAddAbd	Kinematic	Q05	14.000 [7.000-34.500]	16.000 [8.000-50.000]	55.000 [34.500-89.200]	7.60687	0.0222941	1	0.0452707	0.120491
ShoulderLeftAddAbd	Kinematic	Q95	112.500 [92.750-124.750]	114.000 [111.000-116.000]	123.000 [117.500-137.000]	5.2294	0.0731896
ShoulderLeftAddAbd	Kinematic	Range	88.500 [59.250-113.750]	96.000 [69.000-104.000]	83.000 [41.000-94.000]	1.20975	0.546142
ShoulderLeftAddAbd	Kinematic	Std	29.714 [17.735-37.035]	31.532 [23.145-31.966]	22.909 [11.822-25.394]	3.90393	0.141995
ShoulderLeftFlexExt	Kinematic	IQR	7.500 [1.250-22.500]	8.000 [0.000-8.000]	0.000 [0.000-0.000]	5.03372	0.0807127
ShoulderLeftFlexExt	Kinematic	Mean	3.059 [0.314-5.141]	-3.487 [-4.858-0.000]	24.817 [0.052-33.740]	7.87992	0.019449	0.42441	0.542323	0.0209221
ShoulderLeftFlexExt	Kinematic	Median	0.000 [0.000-0.000]	0.000 [-5.000-0.000]	0.000 [0.000-0.000]	7.38027	0.0249686	1	0.172313	0.0391758
ShoulderLeftFlexExt	Kinematic	Q05	-14.000 [-35.750--5.150]	-10.000 [-16.000-0.000]	0.000 [0.000-0.000]	10.2112	0.00606275	0.966769	0.00798361	0.0479323
ShoulderLeftFlexExt	Kinematic	Q95	25.800 [7.500-57.850]	0.000 [0.000-8.000]	154.000 [0.000-175.000]	4.19946	0.122489
ShoulderLeftFlexExt	Kinematic	Range	53.600 [18.400-106.900]	15.000 [10.000-21.000]	154.000 [9.300-175.000]	3.05975	0.216563
ShoulderLeftFlexExt	Kinematic	Std	21.897 [9.223-44.748]	5.110 [3.735-7.312]	63.572 [6.114-66.681]	4.57951	0.101291
ShoulderLeftIntraExtra	Kinematic	IQR	55.000 [30.250-67.250]	53.000 [17.000-68.000]	21.000 [10.000-58.000]	1.25862	0.53296
ShoulderLeftIntraExtra	Kinematic	Mean	58.145 [46.538-64.839]	49.985 [42.340-57.945]	46.790 [24.603-68.668]	0.439557	0.802697
ShoulderLeftIntraExtra	Kinematic	Median	65.500 [54.000-71.500]	58.000 [46.000-71.000]	60.000 [31.000-67.000]	0.981731	0.612097
ShoulderLeftIntraExtra	Kinematic	Q05	5.500 [1.550-37.600]	12.000 [-4.000-34.000]	15.000 [-43.500-48.500]	0.251792	0.881707
ShoulderLeftIntraExtra	Kinematic	Q95	96.000 [86.250-104.250]	80.000 [74.000-88.000]	86.000 [78.800-93.300]	5.83328	0.0541152
ShoulderLeftIntraExtra	Kinematic	Range	81.500 [54.150-114.400]	69.000 [46.000-85.000]	62.000 [44.300-123.500]	0.433021	0.805324
ShoulderLeftIntraExtra	Kinematic	Std	29.919 [19.524-37.757]	25.661 [14.623-33.734]	18.582 [16.125-37.814]	0.479648	0.786766
ShoulderRightAddAbd	Kinematic	IQR	49.000 [29.250-68.500]	77.000 [45.000-87.000]	31.000 [19.000-36.500]	7.71607	0.0211094	0.921666	0.36328	0.018711
ShoulderRightAddAbd	Kinematic	Mean	61.278 [51.468-81.610]	57.085 [47.218-81.507]	101.447 [86.935-105.690]	13.2421	0.00133202	1	0.00317625	0.0148151
ShoulderRightAddAbd	Kinematic	Median	54.500 [28.000-79.250]	29.000 [24.000-77.000]	93.000 [82.000-104.500]	12.401	0.00202847	1	0.0102957	0.00904153
ShoulderRightAddAbd	Kinematic	Q05	17.000 [11.500-39.950]	16.000 [10.000-48.000]	69.000 [50.000-81.000]	12.0151	0.00246016	1	0.00654818	0.0186526
ShoulderRightAddAbd	Kinematic	Q95	118.000 [109.250-126.750]	119.000 [116.000-124.000]	129.000 [123.500-155.000]	6.6716	0.0355861	1	0.0866481	0.109413
ShoulderRightAddAbd	Kinematic	Range	88.600 [77.500-98.750]	99.000 [69.000-108.000]	55.200 [48.000-91.500]	2.56507	0.277334
ShoulderRightAddAbd	Kinematic	Std	29.153 [22.715-36.675]	38.474 [24.470-41.311]	23.118 [16.161-29.453]	4.96613	0.0834871
ShoulderRightFlexExt	Kinematic	IQR	5.000 [0.000-6.750]	3.000 [0.000-7.000]	0.000 [0.000-4.500]	0.670139	0.715288
ShoulderRightFlexExt	Kinematic	Mean	0.322 [-1.200-3.637]	1.427 [-1.724-10.981]	10.290 [2.344-27.907]	6.21882	0.0446274	1	0.0545198	0.241365
ShoulderRightFlexExt	Kinematic	Median	0.000 [0.000-0.000]	0.000 [-2.000-0.000]	0.000 [0.000-0.000]	5.38093	0.0678493
ShoulderRightFlexExt	Kinematic	Q05	-11.500 [-21.000--8.650]	-10.000 [-12.000--4.000]	0.000 [0.000-0.000]	12.6991	0.00174755	1	0.00360492	0.00923439
ShoulderRightFlexExt	Kinematic	Q95	36.800 [11.000-74.500]	10.600 [2.000-153.000]	104.600 [8.000-171.300]	1.4515	0.48396
ShoulderRightFlexExt	Kinematic	Range	70.800 [20.250-96.450]	18.000 [16.200-153.000]	104.600 [13.000-171.300]	0.6297	0.729898
ShoulderRightFlexExt	Kinematic	Std	21.146 [6.133-25.599]	25.184 [5.172-39.838]	27.195 [12.862-64.273]	1.74817	0.417244
ShoulderRightIntraExtra	Kinematic	IQR	49.500 [13.000-57.750]	54.000 [13.000-58.000]	27.000 [17.000-46.000]	1.06822	0.586191
ShoulderRightIntraExtra	Kinematic	Mean	55.973 [42.158-66.016]	40.331 [36.258-56.706]	47.801 [34.844-71.849]	0.208394	0.901048
ShoulderRightIntraExtra	Kinematic	Median	66.000 [56.250-71.750]	54.000 [37.000-68.000]	59.000 [51.500-67.500]	0.921256	0.630887
ShoulderRightIntraExtra	Kinematic	Q05	2.200 [-9.650-9.550]	5.000 [3.000-28.000]	-15.000 [-62.300-51.500]	0.900113	0.637592
ShoulderRightIntraExtra	Kinematic	Q95	84.000 [76.200-100.700]	78.000 [75.000-83.000]	82.000 [74.000-85.500]	0.691376	0.707733
ShoulderRightIntraExtra	Kinematic	Range	91.800 [74.950-102.550]	73.000 [46.000-77.000]	118.600 [27.500-142.300]	1.96519	0.374338
ShoulderRightIntraExtra	Kinematic	Std	34.275 [27.419-39.146]	25.689 [23.349-29.153]	40.508 [9.861-48.629]	0.805396	0.668514
Trunk Rotation	Kinematic	IQR	16.000 [10.250-18.500]	13.000 [9.000-13.000]	18.000 [13.000-26.500]	3.47623	0.175852
Trunk Rotation	Kinematic	Mean	5.237 [4.073-5.842]	2.203 [1.215-3.429]	5.121 [3.512-7.271]	5.73384	0.0568738
Trunk Rotation	Kinematic	Median	2.000 [2.000-2.750]	2.000 [0.000-2.000]	2.000 [-0.500-2.500]	0.822897	0.66269
Trunk Rotation	Kinematic	Q05	-16.500 [-23.500--8.500]	-15.000 [-20.000--9.000]	-25.000 [-30.500--13.000]	3.24361	0.197542
Trunk Rotation	Kinematic	Q95	24.500 [17.250-32.500]	15.000 [12.000-20.000]	33.000 [23.800-36.000]	7.16002	0.0278754	0.180491	1	0.0446972
Trunk Rotation	Kinematic	Range	42.500 [22.000-51.500]	33.000 [22.000-40.000]	56.000 [34.800-67.000]	5.34874	0.0689504
Trunk Rotation	Kinematic	Std	12.524 [7.679-16.304]	9.446 [6.451-11.373]	16.541 [10.553-20.488]	4.91764	0.0855358
